# Supplementary material for: A Universal Trend among Proteomes Indicates an Oily Last Common Ancestor
Source: PubMed Central journal article supplement (PMC3531291; doi:10.1371/journal.pcbi.1002839), 2012-12-27
Supplement: pcbi.1002839.s001.pdf [file pcbi.1002839.s001.pdf]

# Text S1. Supporting information to: “A universal trend among proteomes indicates an oily last common ancestor”

Ranjan V. Mannige<sup>1,2,3,4\*</sup>, Charles L. Brooks III<sup>2</sup> and Eugene I. Shakhnovich<sup>1</sup>

<sup>1</sup>Department of Chemistry and Chemical Biology, Harvard University, Cambridge, MA, USA

<sup>2</sup>Departments of Chemistry and Biophysics, University of Michigan, Ann Arbor, MI, USA

<sup>3</sup>Department of Molecular Biology, The Scripps Research Institute, La Jolla, CA, USA

<sup>4</sup>Center for Theoretical Biological Physics, UC San Diego, La Jolla, CA, USA

\*To whom correspondence should be addressed; E-mail:

rvmannige@lbl.gov

## S1 Discussions regarding molecular evolution and proteome composition change.

The following three subsections will discuss the following three points respectively: (i) even though every organism today is expected to have existed in *some* form since the emergence of life (Darwin's common descent axiom), not all proteomes have evolved/mutated to the the same extent since the last common ancestor (LCA); speciation events account for a large number of sequence substitutions; (ii) probability of oil-content-changing substitutions are expected to occur more often during speciation events; (iii) in absence of an entropic drive to change oil content, one would need an unacceptably large number of random mutations to observe the range of oil contents observed in our dataset.

### S1.1 A sequence's oil content is expected to change at a glacial pace compared to the molecular evolution that drives it; a continual random walk in sequence space for billions of years can not explain the range of protein hydrophobicity observed

As an alternative (null) hypothesis to the oil escape described in the paper, let us assume that the (8%) range in oil content observed in the paper (Fig. 2) is due to a random drift in sequence space since the LCA. We can show, by modeling the evolution of the proteome by a random walk, that this null hypothesis is very unlikely to have occurred.

Take a proteome of size  $N$ , with  $H$  number of hydrophobic residues ( $0 \leq H \leq N$ ). Also, assume that any mutation independently changes the hydrophobicity ( $H$ ) by  $\pm 1$  amino acid. Each successive accrued mutation may then be considered as a random walk on an integer number line (shown below) where the current position is the hydrophobicity of the proteome.

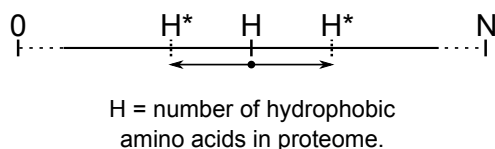

Assuming that  $M$  point mutations have been accrued, the change in the number of hydrophobic residues in the proteome,  $\Delta H$ , will be approximately of the order of the  $\sqrt{M}$  (obtained from theory on random walks on integer number lines), i.e.,

$$\Delta H \approx \sqrt{M}$$

So, the change in fraction (or percent) hydrophobic residue in the proteome will be related to the number of accumulated mutations per amino acid position:

$$\frac{\Delta H\%}{100} \text{ or } \Delta H_{fraction} = \frac{\Delta H}{N} \approx \frac{\sqrt{M}}{N}$$

Now, assuming a proteome size of  $N = 2,000,000$  (which is the size scale of a proteome belonging to a large bacterium such as *Mycobacterium smegmatis*), given the equation above, we would require about  $(N \times 0.08)^2 = 25.8 \times 10^9$  number of random mutations per proteome (or 12,800 mutations per amino acid position) to shift the hydrophobicity of the proteome by the observed 8%. Given the acceptable average mutational rate of  $10^{-9}$  mutations per amino acid position per year or 1 mutation per position per one billion years (a commonly reported magnitude<sup>1</sup>), we would expect a random walk to produce an 8% drift in hydrophobicity (for  $N = 2,000,000$ ) only after roughly  $12.8 \times 10^{12}$  or 12.8 trillion years of evolution, which is substantially larger than the expected age of the universe, much less the expected age of earth.

Although the example above uses a specific value for proteome size ( $N$ ), plugging in other values for  $N$  in the above equation will provide similar results, indicating the implausibility of attaining the range of hydrophobicity by simple random mutational diffusion. For example, a high average mutation rate of  $6 \times 10^{-9}$  brings the number of years required to obtain an 8% shift in hydrophobicity to a still high 2.1 trillion years. For the present  $N$ , one would need a substitution rate of  $4.26 \times 10^{-6}$  to cause an 8% shift in hydrophobicity, which is far from the observed regime of  $10^{-9}$  amino acid substitutions per site per year; the observed change in % hydrophobicity ( $\Delta H\%$ ) can not be attributed to or caused by random mutational drift in the sequence, which raises the plausibility of drift by oil escape. The following subsection further strengthens this claim.

**More/empirical problems with randomly changing a proteome's  $H$ .** There are also other considerations that further diminish the effect of random point mutations on drift in hydrophobic content:

(A) the random walk in  $H$  (described above) required that mutations are always “non-synonymous” (i.e., they *must* change  $H$ ). However, this move set does not consider “synonymous” mutations, where one hydrophobic residue is replaced with another (and the same for non-hydrophobic residues), which will drastically increase the number of mutations required to obtain a translation of 1 unit in the number line above (since many “walks” will be ineffective in translating  $H$ ). For example, if we consider only F,I,L and V as hydrophobic amino acids (chosen since %FILV was our metric for hydrophobicity in the manuscript), then an attempted mutation will be a hydrophobicity modifying mutation only 32% of the time.

(B) As evident in the sequence substitution matrices (Table S1), mutations that maintain proteome (oil or charge) composition are much likely to occur (and be kept for posterity) than mutations that modify oil/charge content.

Both (A) and (B) indicate that the actual extent to which random accumulated mutations or sequence “drift” affects oil content will be even lower than those estimated by a simple random walk in  $H$  space (since more mutations are required in order to shift a proteome's  $H$  by even 1 unit on the number scale above).

**In conclusion**, the composition shifting substitutions within a genome are likely not made during neutral drift, i.e.,  $g$ 's contribution to the composition change by substitution that we term as “oil escape” is expected to be minimal compared to the substitutions incurred during the speciation events due to increased substitution rates,<sup>2-12</sup> hitchhiking,<sup>13-15</sup> and presumably reduced population sizes (and high fixation probabilities)<sup>16</sup> during speciation events.

## S1.2 Mutations tend to favor the preservation of oil and charge content in a sequence.

| Substitution matrix used | Average log odds for a type of mutation: |                                          |                                          |                                         |                                         |
|--------------------------|------------------------------------------|------------------------------------------|------------------------------------------|-----------------------------------------|-----------------------------------------|
|                          | Random mutation                          | Composition shifting mutation            |                                          | Composition preserving mutation         |                                         |
|                          | $\mathbf{X} \leftrightarrow \mathbf{X}$  | $\mathbf{H}' \leftrightarrow \mathbf{H}$ | $\mathbf{C}' \leftrightarrow \mathbf{C}$ | $\mathbf{H} \leftrightarrow \mathbf{H}$ | $\mathbf{C} \leftrightarrow \mathbf{C}$ |
| Blosum30 <sup>17</sup>   | -0.0215                                  | -0.3132                                  | -0.1816                                  | 0.7000                                  | 0.5800                                  |
| Blosum40                 | -0.0523                                  | -0.5263                                  | -0.3059                                  | 0.9250                                  | 0.8750                                  |
| Blosum50                 | -0.1191                                  | -0.8158                                  | -0.5088                                  | 1.0000                                  | 1.0000                                  |
| Blosum62                 | -0.2605                                  | -1.0197                                  | -0.6579                                  | 1.1500                                  | 1.1500                                  |
| Blosum70                 | -0.3157                                  | -1.2039                                  | -0.8289                                  | 1.1500                                  | 1.1500                                  |
| Blosum80                 | -0.2481                                  | -1.3246                                  | -0.9211                                  | 1.1333                                  | 1.1667                                  |
| Blosum85                 | -0.4077                                  | -1.4408                                  | -1.0329                                  | 1.1500                                  | 1.2000                                  |
| Blosum90                 | -0.4444                                  | -1.5197                                  | -1.1118                                  | 1.1500                                  | 1.1500                                  |

Table S1: **Historically, fixed mutations that preserve oil/charge content are much more probable than those that do not.** Proteome composition-maintaining mutations are highly probable, which is indicated by a positive average log-odds score (see equation below; each log odds value was obtained from matrices found on the NCBI FTP database at <ftp://ftp.ncbi.nih.gov/blast/matrices/>). Conversely, proteome composition-shifting mutations appear to be even more improbable than mutations that appear randomly. This indicates that, a random drift of sequence space is under active pressure to maintain proteome composition (almost certainly due to the biophysical requirement of maintaining protein structure/function). Note that while the Blosum matrices are general indicators of trends of acceptable substitutions, such a matrix can not represent all sequence evolution situations given the heterogeneity in rates of nucleotide substitution.<sup>18,19</sup>

**AMINO ACID KEYS:**  $\mathbf{X}$  is the set of all possible amino acids, the hydrophobic amino acids  $\mathbf{H} \in [F, I, L, V]$  (the top four most hydrophobic residues as per the Kyte-Doolittle scale), and the charged amino acids  $\mathbf{C} \in [E, R, D, K]$ , while  $\mathbf{H}'$  and  $\mathbf{C}'$  are all amino acids not including  $\mathbf{H}$  and  $\mathbf{C}$ , respectively.

**EQUATION:** The log-odds of substitution ( $M_{ij}$  in bit units), for any two amino acids  $i, j$  was obtained from published Blosum matrices<sup>17</sup> and normalized to represent bit units; so,  $M_{ij} = \log_2(P_{ij}/q_i q_j)$ , where  $q_i$  is the natural frequency of amino acid  $i$  in sequences,  $P_{ij}$  is the probability of the two amino acids  $i$  and  $j$  replacing each other at a homologous position. The odds of a mutation may be obtained from the expression  $2^{M_{ij}}$ .

The various Blosum<sup>17</sup> substitution matrices (obtained from the NCBI FTP database <ftp://ftp.ncbi.nih.gov/blast/matrices/>) indicate that mutations that preserve the proteome/sequence's % hydrophobic content ( $\mathbf{H}$ ) (and % charge content,  $\mathbf{C}$ ) are much more probable than those that cause fluctuations in oil or charge content. Notably,  $\mathbf{H}$  and  $\mathbf{C}$  modifying mutations are not even marginally tolerated (as indicated by their lower average log odds score than even the expected log odds score for a randomly picked amino acid pair).

### **S1.3 Rates of molecular evolution (by nucleotide substitutions) and speciation events are linked (i.e., node number $\propto$ number of accumulated substitutions).**

Summary:

- It has been shown that speciation events are concomitant with an increased rate of substitution.

The emergence of the molecular clock hypothesis,<sup>20–22</sup> along with the neutral<sup>23–25</sup> and nearly neutral<sup>26–28</sup> theories of molecular evolution (reviewed by Ohta and Gillespie<sup>29</sup>) posited that a vast majority of nucleotide substitutions have neutral effect on fitness, which, in turn, indicate a constant substitution rate—for *all* sequences regardless of species—over time (like the ticking of a molecular clock). Although it is undeniable that neutral drift in sequence space must happen (given the finite size of all populations), the inaccuracies within the rates of molecular clocks (reviewed by Bromham<sup>30</sup>), together with the emergence of alternative molecular clock models (e.g., the episodic molecular clock<sup>31,32</sup>) and a better understanding of mutation rate change during speciation (reviewed below), we can be more certain that speciation events (and node formation in the tree) accounts for a substantial additional genome deviation.

One of the early pieces of evidence indicating that speciation events were concomitant with higher rates of molecular evolution was reported in 1990, when Mindell, Sites and Graur<sup>2</sup> found that a noticeable increase in nucleotide substitution rates can be associated with speciation (or diversification) events in sceloporine lizards. Although this study dealt with lizards in particular, and the study *has* been contested,<sup>33</sup> an empirical precedence was set in trying to determine the linkage between substitution rates and speciation. Today, evidence of linkage between molecular rates and speciation/diversification has been found within clades as diverse as angiosperms,<sup>3</sup> birds,<sup>4,5</sup> and confamilial sauropsids (birds and reptiles).<sup>6</sup> Importantly to the manuscript, a study of a large number of available phylogenies (unbiased by node density artifacts<sup>34,35</sup>) indicated direct correlations between node number (identical in form to the “node number” in the MS) and extent of sequence divergence from the last common ancestor<sup>7–11</sup> (for striking graphs, please refer to Fig. S1 in Webster *et al.*'s paper<sup>7</sup> and Fig. A3 in Venditti *et al.*'s paper<sup>9</sup>). This direction finally culminated in the finding that increased mutation rates during speciation events *explain* rate discrepancies in molecular clocks,<sup>12</sup> which was otherwise a scarcely understood issue (with specific exceptions<sup>36,37</sup>). It is very interesting that, among a diverse group of phylogenetic trees, the discrepancies in the expected molecular clock rates have been explained merely by the additional effects of increasing substitution rates during cladogenesis (Fig. 4 in Pagel *et al.*'s report<sup>12</sup>).

From these studies, it appears incontrovertable that increased mutation rates during speciation events *do* significantly contribute to the rate of non-synonymous substitution that was previously predominantly thought to be dominated by neutral drift and phyletic gradualism.

## S1.4 Oil escape is expected to happen predominantly during speciation events and less so during neutral drift.

As described in the previous section, the total number of substitutions (or total “deviation”) of a sequence from its last common ancestor can be split into (i) the deviation caused by a time-dependent neutral drift (which is expected to be generally equal for all sequences today<sup>2, 12, 23, 24, 29</sup>) and a node-number-dependent burst of substitutions that are indicative of speciation events.<sup>2-12</sup> Pagel *et al.* provide an equation describing this cumulative drift<sup>12</sup> (which is a variation of an earlier formalism<sup>2</sup>), where the total amount of deviation ( $x$ ) of a species from the common ancestor (placed at the root) in a phylogenetic tree is described as

$$x = n\beta + g \quad (1)$$

Here,  $n$  is the node number of the sequence (related to the number of speciation events in its lineage leading to the common ancestor),  $\beta$  is the rate of substitution during speciation one event, and  $g$  is the constant number of substitutions encountered by neutral drift (Mindell *et al.* describe  $g$  as time multiplied by a constant rate of divergence by neutral or “anagenic” drift<sup>2</sup>).

Given the previous section, the following inferences can be made:

- Constant neutral drift ( $g$  in Equation 1) acts on all genomes at approximately the same rate<sup>2, 12</sup> (especially under the nearly neutral theory reviewed by Ohta and Gillespie<sup>29</sup>), and can not account for differences between species in the number of substitutions accumulated, i.e., *all sequences have diverged equally due to this phenomenon.*
- Neutral drift accounts for only those nucleotide substitutions that are “neutral” or “nearly neutral”, which include synonymous substitutions that display neutral fitness effects *and* a fraction of the non-synonymous mutations that display “nearly neutral” fitness effects.<sup>23, 24, 29</sup> This indicates that neutral drift would vastly account for mutations that are not under strong selective pressures, such as those mutations that maintain homology (or biochemistry) among protein sequences (as predicted by high log-odds scores for those residue substitutions in BLOSUM matrices<sup>17</sup>). As shown in Table S1, mutations that tend to change oil (FILV) or charge (ERDK) *content* within a sequence are significantly lower in log-odds probabilities than mutations that *maintain* sequence oil- and charge-composition, i.e., neutral drift manifested in non-speciation times of a genome (and the  $g$  component of Equation 1) is expected to have little effect on (oil and charge) composition change.
- Given the inability for neutral drift to explain the shift in a proteome’s oil content, what else could explain such a phenomenon? An alternative explanation to neutral drift for the introduction of composition changing (and low-BLOSUM-score) substitutions into a sequence is by hitch-hiking of slightly deleterious mutations along with adaptive mutations (the genetic “draft” or hitch-hiking hypothesis<sup>13-15</sup>) during the burst of possibly adaptive mutations expected to accompany speciation events,<sup>2-12</sup> i.e., oil escape is expected to happen majorly under speciation events or creation of additional nodes in a species’ lineage.

The true phenotype of oil-composition-changing mutations—whether these mutations are functionally adaptive or non-adaptive and possibly deleterious—might indicate alternative mechanisms involving oil-composition-changing substitutions, however, those distinctions are not as important as the statement that these substitutions are *not* expected to be nearly neutral, and so, are not expected to happen during the Kimura (or Ohta) style neutral genetic drift. Also, as discussed in the next subsection Section S1.1, a random drift in oil content is not capable of shifting the oil content of a proteome by unbiased random drift, and if fact, a bias (or “field” applied onto the random choices of substitution made, e.g., one that exists when starting at higher oil contents) is necessary to explain such an oil escape.

## S2 The seed proteins used to produce Fig. 3A:

### FASTA file of the seed protein used to produce Fig. 3A, left panel:

```
>d2fcwb1 g.12.1.1 (B:86-124) Ligand-binding domain of low-density lipoprotein receptor {Human (Homo sapiens) [TaxId: 9606]}
KTCSQAEFRCHDGKCI SRQFVCDSDRCLDGSDEASCPV
```

### FASTA file of the seed protein used to produce Fig. 3A, center panel:

```
>d1jgla_ c.66.1.7 (A:) Protein-L-isoaspartyl O-methyltransferase {Archaeon Pyrococcus furiosus [TaxId: 2261]}
EKELYEKWMRTVEMLKAEG IIRSKVEVERAFLKYPRYLSVEDKYKKYAHIDEPLPIAGQTVSAPHMVAIMLEIANLKPGMNILEVGTGSGWNAALISEIVKTDVYTIE
RIPELVEFAKRNLERAGVKNVHVILGDGSKGFPPKAPYDVIIIVTAGAPKIPEPLIEQLKIGGKLIIPVGSYHLWQELLEVRKTKDGIKIKNHGGVAFVPLIGEYGWK
```

### FASTA file of the seed protein used to produce Fig. 3A, right panel:

```
>d1qgea_ a.118.8.1 (A:) Vesicular transport protein sec17 {Baker's yeast (Saccharomyces cerevisiae) [TaxId: 4932]}
ISDPVELLKRAEKKGVPSGFMKLFSGSDSYKFEEAADLCVQAATYRRLKELNLAGDSFLKAADYQKKAGNEDEAGNTYVEAYKCFKSGNSVNAVDSL ENAIQIFT
HRGQFRRGANFKFELGEILENDLHDYAKAIDCYELAGEWYAQDQSVALS NKCFIKCADLKDQYIEASDIYSKLIKSSMGNRLSQWLSLKDYFLKKGLCQLAATDAV
AAARTLQEGQSEDPNFADSRRESNFLKSLIDAVNEG DSEQLSEHCKEFDNFMR LDKWKITILNKIKESIQQQEDD
```

### S3 Useful figures

**A**

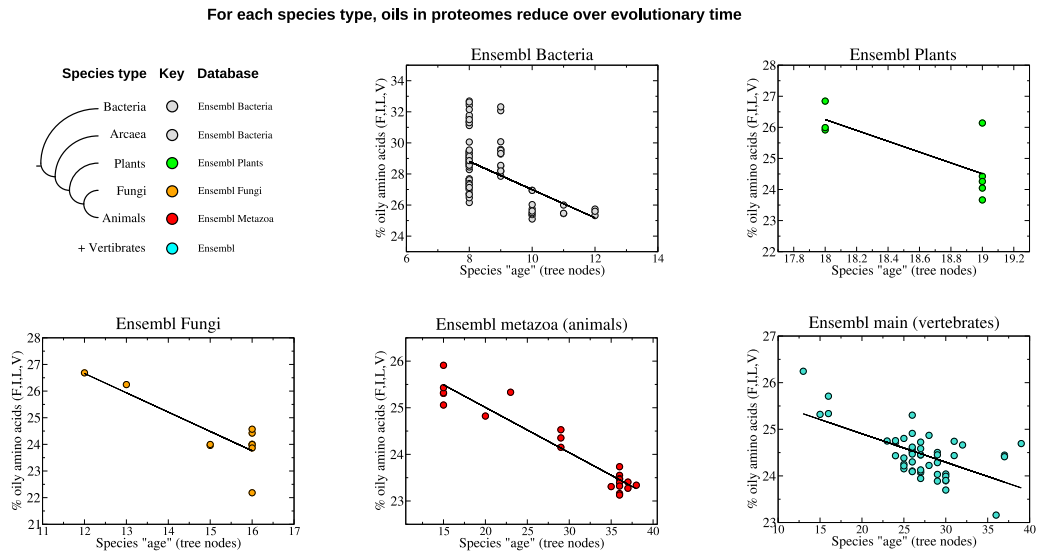

**B**

| Ensemble database | # of unique proteomes | Spearman stats ( $r_s$ , p-val) | Pearson stats ( $r$ , p-val) | Kendal $\tau$ stats ( $r$ , p-val) |
|-------------------|-----------------------|---------------------------------|------------------------------|------------------------------------|
| Plants            | 8                     | (-0.3810, 0.3518)               | (-0.7595, 0.0288)            | (-0.5368, 0.0630)                  |
| Metazoa           | 22                    | (-0.7818, 1.7e-5)               | (-0.9589, 2.1e-12)           | (-0.6940, 6.2e-6)                  |
| Main              | 51                    | (-0.4479, 9.8e-4)               | (-0.6124, 1.8e-6)            | (-0.3533, 2.5e-4)                  |
| Fungi             | 11                    | (-0.2841, 0.3972)               | (-0.8387, 0.0013)            | (-0.3990, 0.0875)                  |
| Bacteria          | 60                    | (-0.29328, 0.0230)              | (-0.59938, 4.2e-7)           | (-0.37432, 2.4e-5)                 |
| ALL               | 156                   | (-0.8464, 5.6e-44)              | (-0.7743, 2.1e-32)           | (-0.6882, 3.1e-37)                 |

Figure S1: **(A)** is an expansion of the panels in Fig 1A that describe oil escape in even individual databases. Statistics of the correlations coefficients obtained by different methods are shown in **(B)**. Each point represents proteomes belonging to distinct species (multiple datasets from the same species were merged).



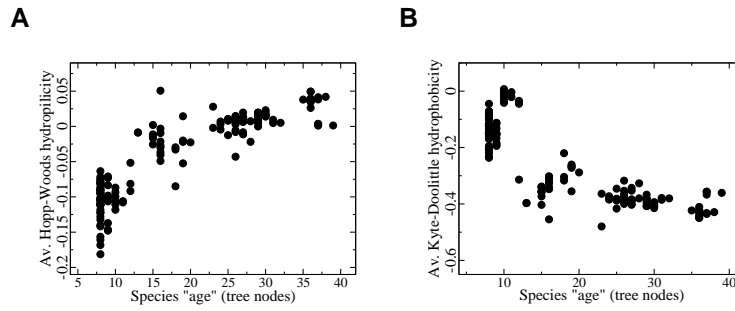

Figure S2: Reflecting the trends in the top four most hydrophobic residues (Fig. 2B), the proteome’s average hydrophilicity increases over evolutionary time (A), while the proteome’s average Kyte-Doolittle hydrophobicity decreases (B). In (A) the  $r$  and  $p$ -value for Spearman, Pearson and Kendal  $\tau$  regression statistics are (0.8798, 2.6e-50), (0.8739, 7.7e-49) & (0.7003, 1.6e-37), respectively. For (B), those values respectively are (-0.8091, 1.9e-36), (-0.8266, 2.8e-39) & (-0.6197, 9.3e-30).

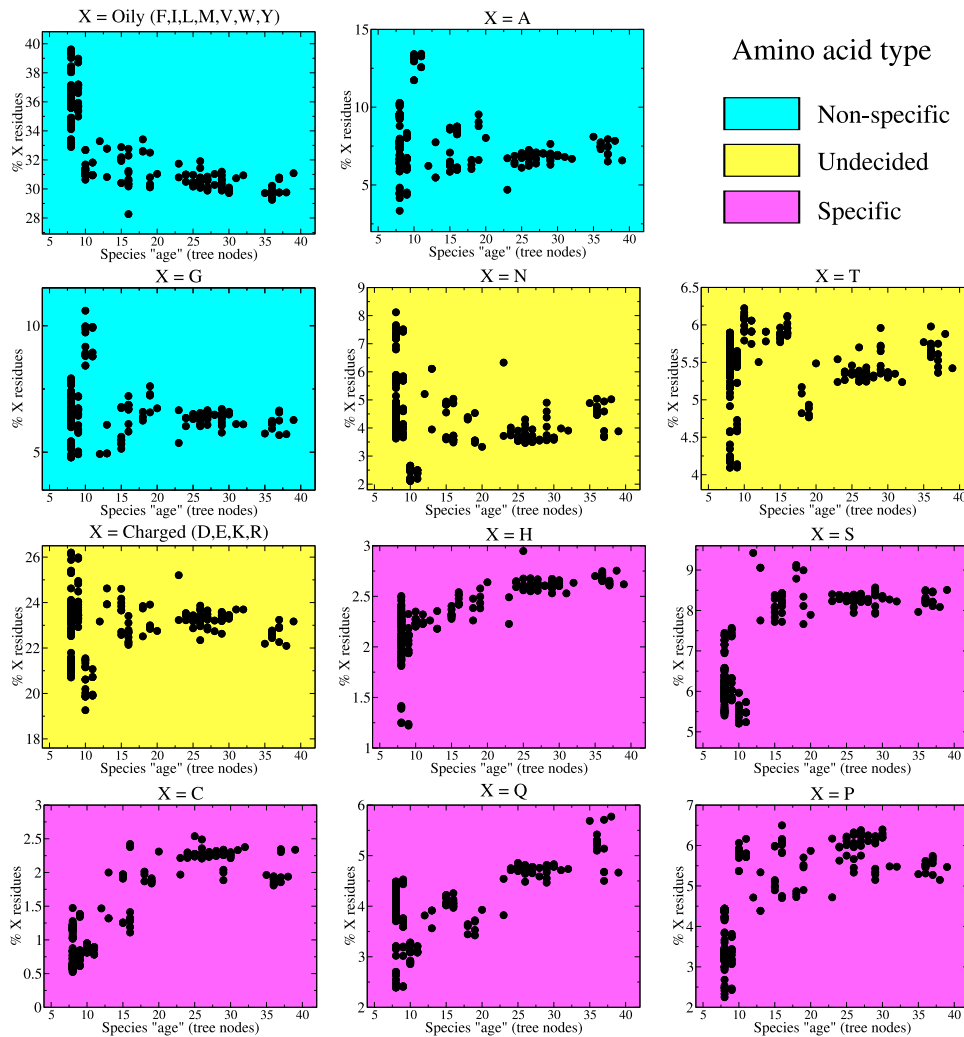

Figure S3: **Proteomes are increasing in “specificity” over evolutionary time.** An increase in the frequency of oily (non specific) residues, is mirrored by those residues that provide specificity to a protein (such as disulphide and hydrogen bonding polar residues), while those residues that have ambivalent features (such as charges, which may be used to maintain disorder, like in intrinsically disordered proteins, and order, like in proteins stabilized by salt bridges) show “ambivalent drift” over node space (which would indicate more niche-like constraints for these residues). These trends support the pluripotent mechanism (described in the text) as the originator of the protein repertoire.

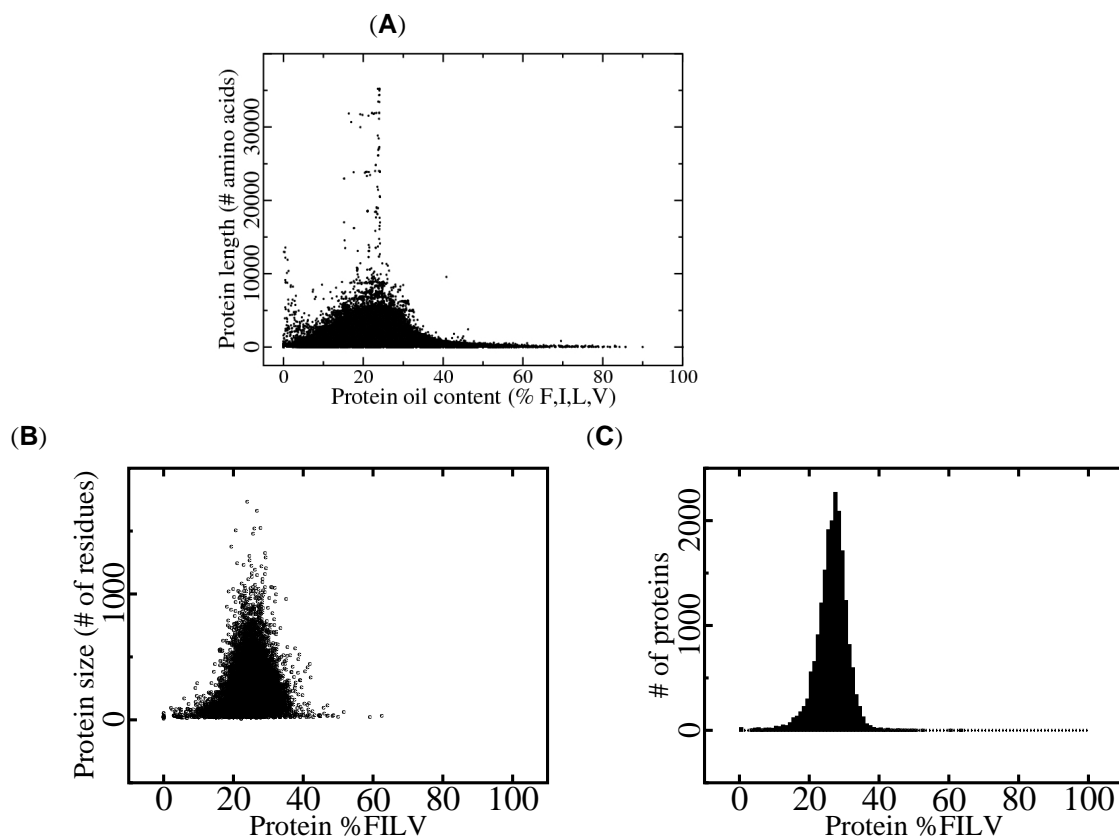

Figure S4: **Protein oil content is not a strongly controlled value.** A scatter plot of oil content vs. protein size in both the predicted proteomes (A) and a non-redundant set of the protein databank (B) indicates that an evolved protein's oil content depends little on its length (otherwise, one would expect the scatter plot to follow a curved trend). This indicates that, within the observed range, protein "oiliness" is not strongly controlled by protein design requirements, and so the drifts visible in Figs. 1 and 2 are functions of the proteome/protein's history rather than any specific protein design requirement. A histogram of protein oil content sourced from domains obtained from the SCOP database v1.75 is shown in (C) for reference.

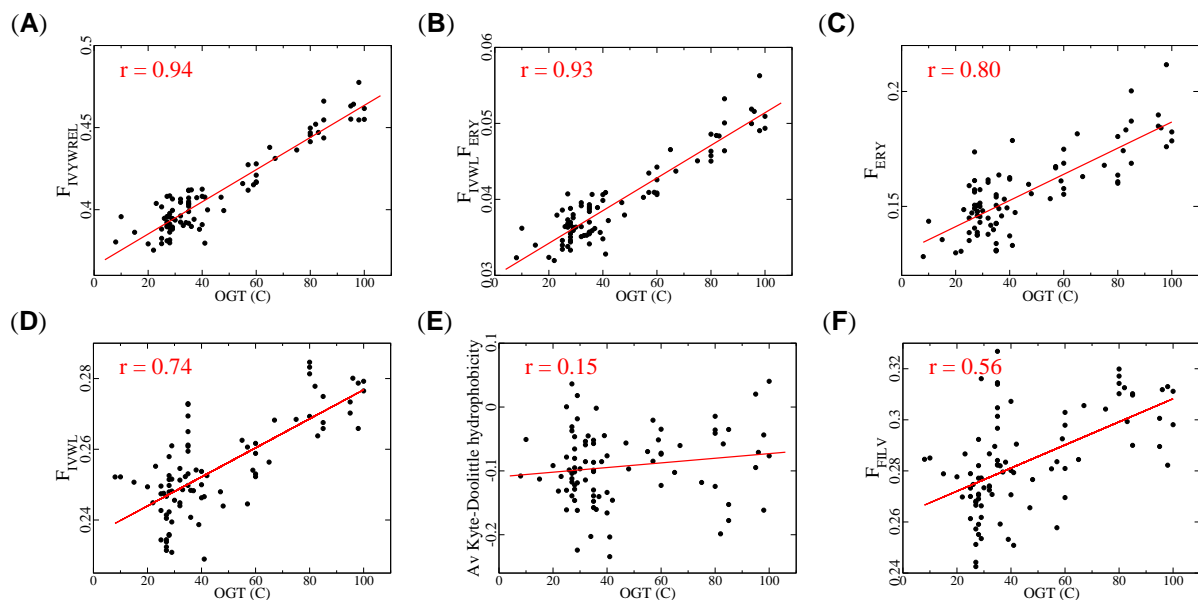

**Figure S5: Only full utilization of the IVYWREL combination provides excellent correlation with OGT in prokaryotes.** Although the summed fraction of amino acids IVYWREL (single amino acid codes used) in a proteome,  $F_{IVYWREL}$ , is an excellent predictor of a prokaryote's optimal growth temperature or OGT (A), both the individual summed fractions of relatively hydrophobic and non-hydrophobic components of IVYWREL ( $F_{IVWL}$  and  $F_{ERY}$ , respectively) are equally required to predict OGT, as indicated by the excellent correlation between OGT and  $F_{IVWL} \cdot F_{ERY}$  (B). This excellent correlation is lost when considering only one of the two fractions (C,D), while the correlation is even less evident when looking at the proteome's average Kyte-Doolittle hydrophobicity (E) and summed fraction of the four oiliest amino acids rated by the Kyte-Doolittle scale (F). The prokaryotic proteomes and their corresponding OGTs used are identical to those described previously.<sup>38</sup>

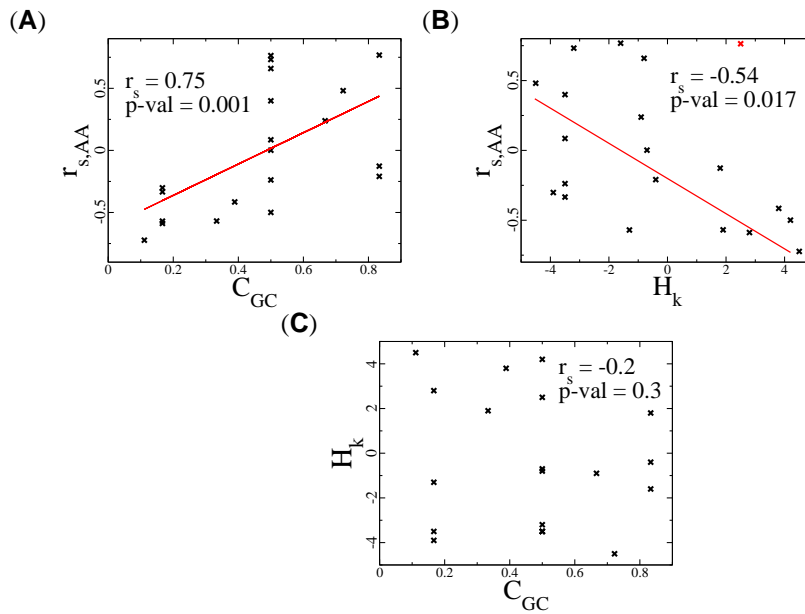

Figure S6: Both the amino acid’s average nucleotide GC fraction per codon or  $C_{GC}$  **(A)** and Kyte-Doolittle hydrophobicity or  $H_k$  **(B)** correlate well with the extent of each amino acid’s evolutionary “drift” over node space (assessed by the Spearman correlation number  $r_{s,AA}$  between the fraction of a single type of amino acid  $F_{AA}$  in a proteome and species node number, which are explicitly shown in Fig. S8). Note that, in panel **B**, Cysteine, marked as a red “x”, was discounted when calculating  $r_s$ , due to its non-canonical property of possessing high hydrophobicity *and* high interaction specificity). However,  $C_{GC}$  and  $H_k$  are themselves *not* even negligibly correlated (given the high probability,  $p\text{-val} = 0.3$ , that the scatter plot in **C** is random). This indicates that there are two separate constrains/drifts at play simultaneously: one at the genome/nucleotide level (GC drift) and one at the proteome/amino acid level (which is the “the oil escape” discussed in the main text). Actual plots of individual amino acid drifts are displayed in Fig. S8.

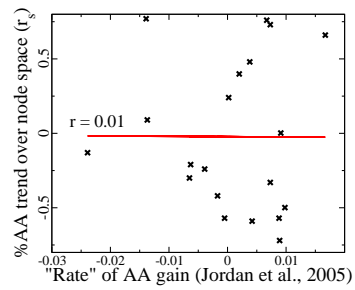

Figure S7: The extent of each amino acid’s evolutionary “drift” over node space (assessed by the Spearman correlation number  $r_{s,AA}$ ) does not correlate with predicted rates of increase/decrease of an amino acid per substitution per protein site [obtained from Table 3 in<sup>39</sup>]. Actual plots of individual amino acid drifts are displayed in Fig. S8.

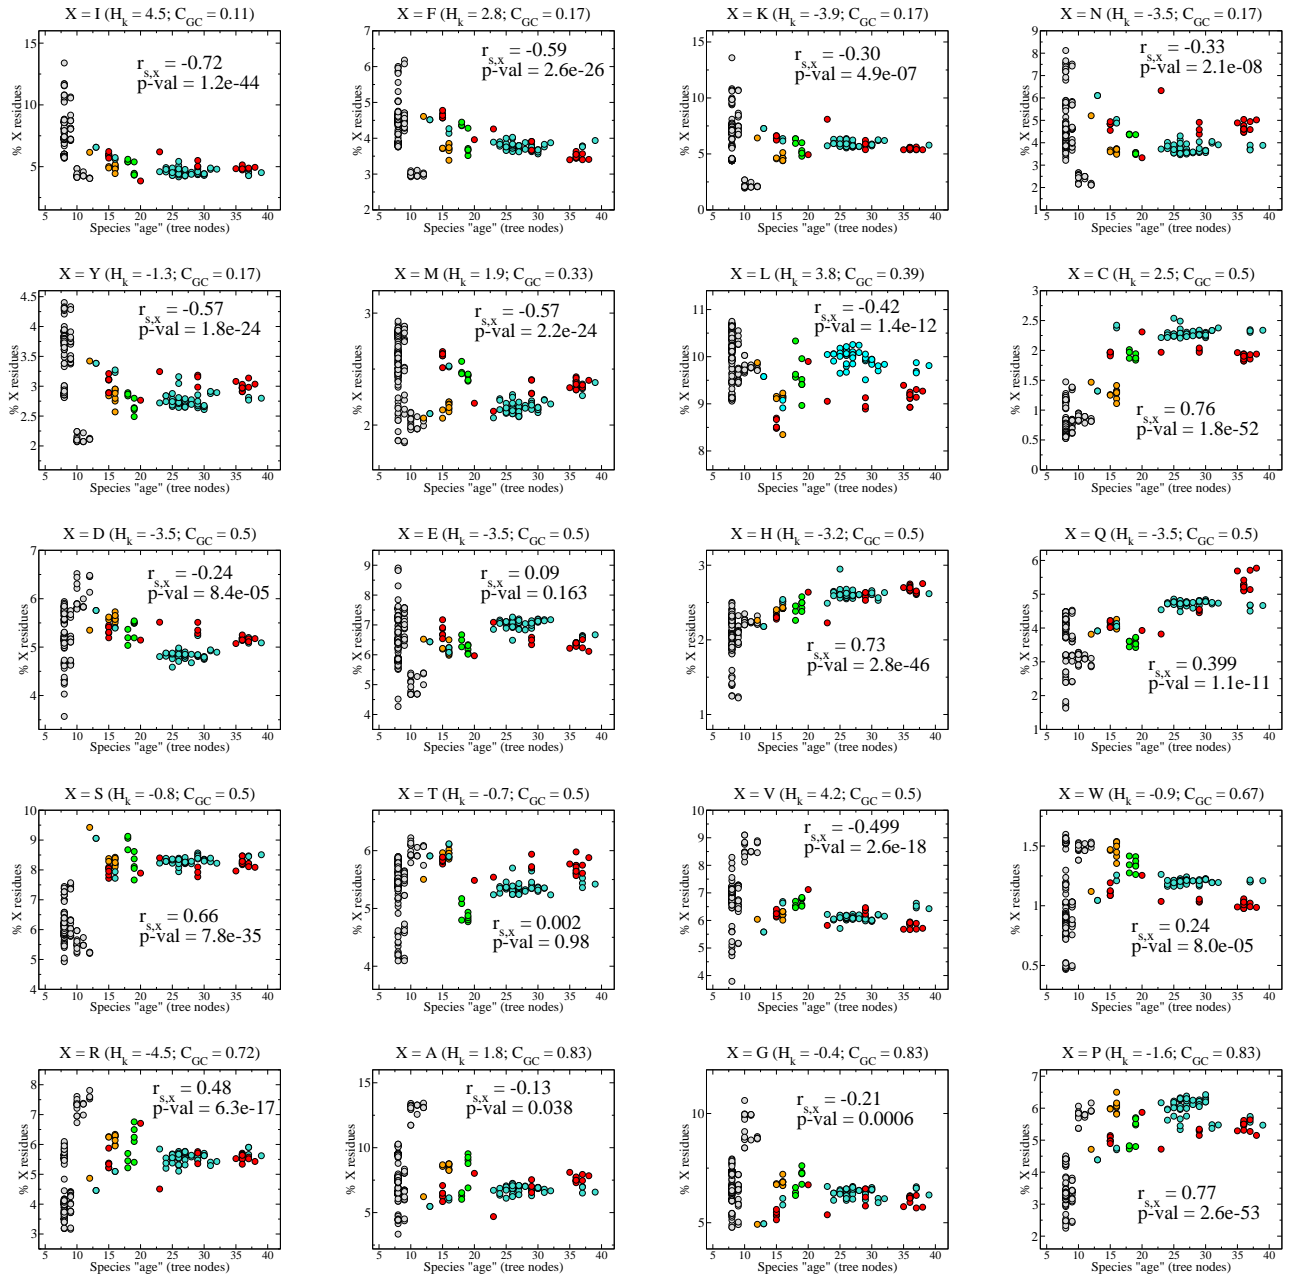

Figure S8: Single amino acid abundances in a proteome (or  $100 \times F_{AA}$ ) plotted over species nodespace. Also shown for each amino acid are the following values that are used in Fig. S6: the average nucleotide GC fraction in a codon ( $C_{GC}$ ), Kyte-Doolittle hydrophobicity ( $H_k$ ), Spearman rank correlation ( $r_{s,AA}$ ) and its corresponding p-value (p-val).

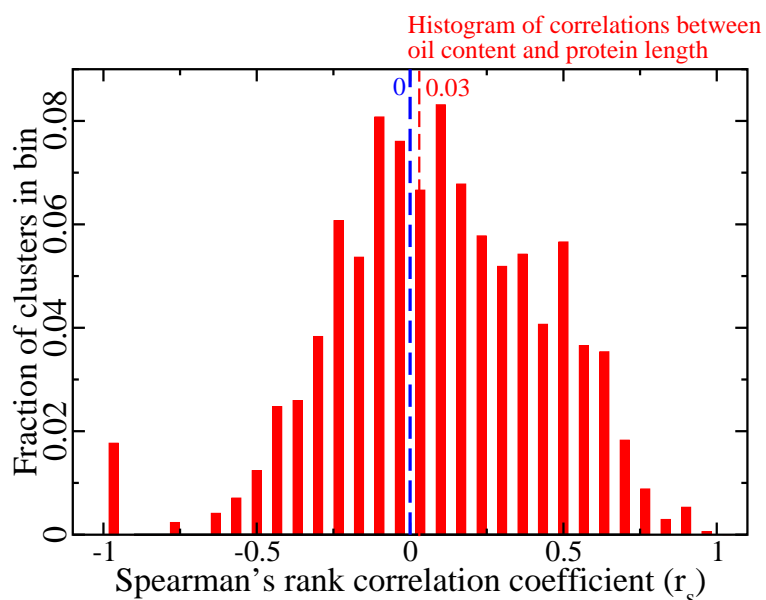

Figure S9: **Protein length within size-homogenized clusters does not correlate with oil content as described by the gaussian distribution of Spearman correlations of length vs. oil content within clusters.** For every size-homogenized cluster showing a statistically significant change in oil content (1697 in total), we calculated the Spearman correlation coefficients ( $r_s$ ) between a protein's oil content versus its length, which is plotted in histogram form. The mean  $r_s$  in this study lies very close to zero (at  $r_s \sim 0.03$ ), indicating a relatively unbiased dependence of oil content on protein length within size-homogenized homologous clusters. The broad distribution of these  $r_s$ 's exist due to the small average size of proteins per cluster. These results indicate that oil escape within globular protein domains was not driven primarily by the addition of loops and intrinsically disordered regions within globular proteins (which would cause the increase in protein length).

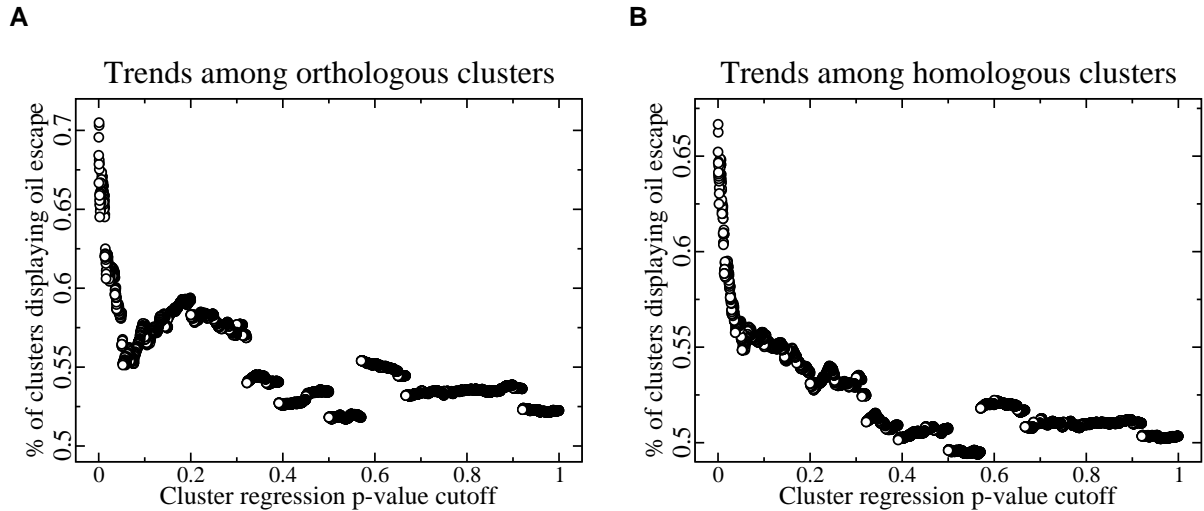

**Figure S10: Among both groups of orthologous proteins (A) and homologous (B) available in the COG database, oil escape is evident.** The single protein studies of Fig. 3 were collected by obtaining the most similar protein from each of the proteomes. In doing so, each cluster is a collection of a orthologs (if we find one for the seed protein) and paralogs (if we do not find an ortholog). However, to many, this study is flawed, as paralogs (that may or may not be directly related to the seed protein) are added to the cluster, thereby reducing the validity of the study. In response, we have performed two new studies using the most recent COG database (each cluster in this database corresponds with a Cluster of Orthologous protein groups ranging through 66 complete genomes<sup>40</sup>). From the database, we performed our regression analysis on both exclusively orthologous protein clusters (A) and homologous clusters (B). The available clusters unfortunately, due to sampling problems (because of smaller dataset size and a shorter range of node numbers as only lower-eukaryotes have been included in the study), often result in statistically irrelevant correlations. However, when we shift the threshold for statistical relevance, we find that more and more number of clusters display oil escape, which strictly tend to favor oil escape as we pass the significance threshold of  $p\text{-value} \leq 0.05$ . Also, interestingly, the statistically significant oil escapes actually increase in percent as one goes from a mix of homologous (orthologous and paralogous) clusters to exclusively orthologous clusters, which only reasserts the claims regarding oil escape among clusters of related proteins.

#### Details:

The tree of life comprises a collapsed, pruned, tree obtained from the iTOL website. The newick format of this tree is as follows:

```
(((Methanopyrus_kandleri, (Thermoplasma_volcanium, Thermoplasma_acidophilum)Thermoplasma, Archaeoglobus_fulgidus, Methanocaldococcus_jannaschii, Halobacterium_sp., Methanothermobacter_thermautotrophicus, (Pyrococcus_horikoshii, Pyrococcus_abyssi)Pyrococcus, Methanosarcina_acetivorans)Euryarchaeota, (Pyrobaculum_aerophilum, Sulfolobus_solfataricus, Aeropyrum_pernix)Thermoprotei)Archaea, (Deinococcus_radiodurans, (Clostridium_acetobutylicum, ((Bacillus_subtilis, Bacillus_halodurans)Bacillus, Staphylococcus_aureus, Listeria_innocua)Bacillales, (Lactococcus_lactis, (Streptococcus_pneumoniae, Streptococcus_pyogenes)Streptococcus)Streptococcaceae)Bacilli)Firmicutes, Thermotoga_maritima, (Chlamydia_pneumoniae, Chlamydia_trachomatis)Chlamydiae, ((Haemophilus_influenzae, Pasteurella_multocida)Pasteurellaceae, Vibrio_cholerae, Pseudomonas_aeruginosa, (Buchnera_sp., Escherichia_coli, Yersinia_pestis, Salmonella_enterica)Enterobacteriaceae, Xylella_fastidiosa)Gammaproteobacteria, ((Brucella_melitensis, (Sinorhizobium_meliloti, Agrobacterium_tumefaciens)Rhizobiaceae, Mesorhizobium_lotii)Rhizobiales, Caulobacter_vibrioides, (Rickettsia_prowazekii, Rickettsia_conorii)Rickettsia)Alphaproteobacteria, (Campylobacter_jejuni, Helicobacter_pylori)Campylobacterales, (Neisseria_meningitidis, Ralstonia_solanacearum)Betaproteobacteria)Proteobacteria, (Ureaplasma_urealyticum, (Mycoplasma_pulmonis, Mycoplasma_genitalium, Mycoplasma_pneumoniae)Mycoplasma)Mycoplasmataceae, (Synechocystis, Nostoc_sp.)Cyanobacteria, Aquifex_aeolicus, (Borrelia_burgdorferi, Treponema_pallidum)Spirochaetaceae, (Corynebacterium_glutamicum, (Mycobacterium_leprae, Mycobacterium_tuberculosis)Mycobacterium)Corynebacterineae, Fusobacterium_nucleatum)Bacteria, (Encephalitozoon_cuniculi, (Saccharomyces_cerevisiae, Schizosaccharomyces_pombe)Ascomycota)Fungi)cellular_organisms)
```



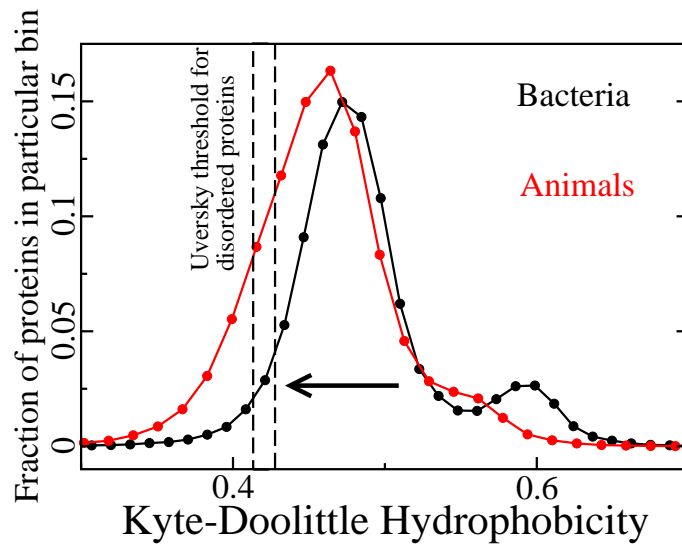

Figure S11: **Oil escape is described by a shift in the near-gaussian distribution of oil content per protein, which precludes theories favoring the preferential adaptation of IDPs in complex organisms.** The figure above provides two histograms, that describes the distribution of protein oil content (this time using the Kyte-Doolittle scheme) among all proteins found in proteomes belonging to all animals (red curve) and bacteria (black curve) described in the SI. It is interesting to note that the two distributions are generally Gaussian-like, and, as discussed in the MS and SI, we expect that the distribution described by the bacterial aggregate would most resemble the last common universal ancestor's oil content, and the red curve represents newer proteomes that emerged only later; this picture can be described by the shift of a unimodal (gaussian) distribution of protein oil contents to lower mean oil contents, where the gaussian distribution slides to the left in the picture. It is important to note that Uversky (Protein Sci. 2002, 11(4):739-56) has shown that a strong divide between IDPs and globular/folded proteins is dictated primarily by a threshold hydrophobicity and secondarily (to a less important degree) by the protein's mean net charge per amino acid. The two vertical, dashed lines describe the threshold for proteins ranging in 10 varying charge configurations (which would involve a large number of proteins we know). The band delineated by the two lines indicates a general sequence-composition-threshold describing the transition between globular proteins and IDPs. If IDPs were to be enriched in later proteomes due to adaptation, then one would expect to find a more aggressive recruitment/invention of IDPs in the proteome, from which we would predict a second hump in the protein hydrophobicity histogram in complex organisms (red). However, all we see in animal proteomes, is a unimodal (single hump) oil-distribution whose tail drifts into the Uversky threshold, thereby putatively allowing for the chance encountering of IDPs in the first place. Given the lack of a new hump in the "Uversky zone" (left of the dashed lines) which would indicate the active enrichment of IDPs in complex organisms, we can infer that Uversky-like IDPs didn't cause, but emerged from the Gaussian shift in oil content over evolutionary time. In conclusion, oil escape since the emergence of the LUCA explains the emergence of IDPs, and there is no reason to expect that any adaptive force drove the emergence of IDPs.

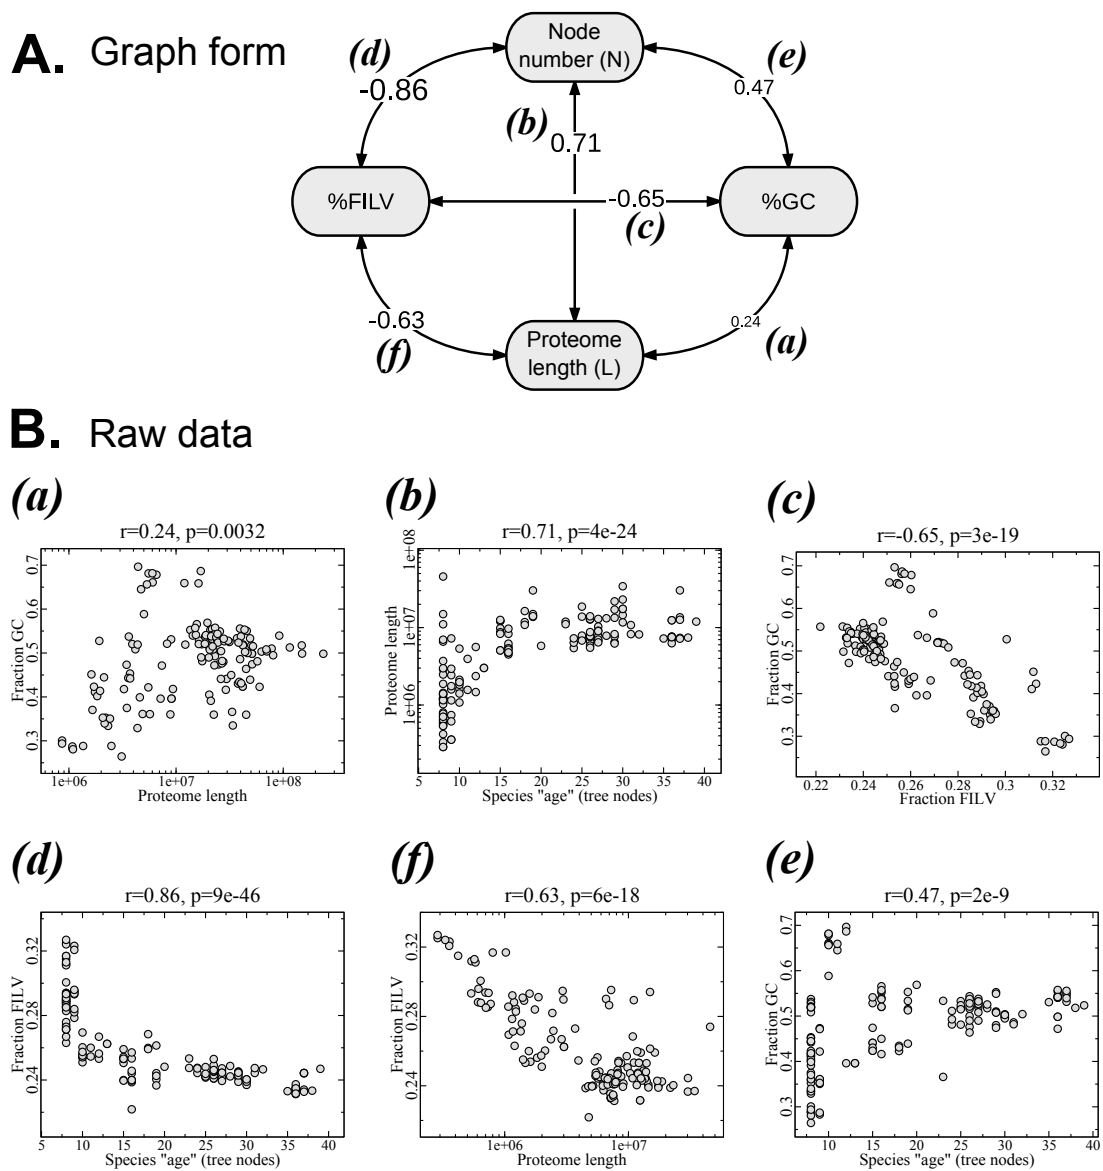

Figure S12: **The complete correlation graph (A) along with the individual relationships (B).** %*FILV* vs node number displays the strongest correlation between the four relationships: %*FILV*, %*GC* (obtained from ensemble cDNA transcripts), node number, and proteome length (*L*). The complete correlation network indicates that while GC content is correlated with node number, only three correlations—(i), (ii) and (iv)—may be sufficient in explaining all other correlations. Also, it is unlikely that the weak relationship between GC content and node number will be able to cause the relationship between *FILV* and node number, i.e., the relationship between GC content and node number is likely either caused by the coupling between *FILV* and GC (ii) or by unknown and independent constraints.

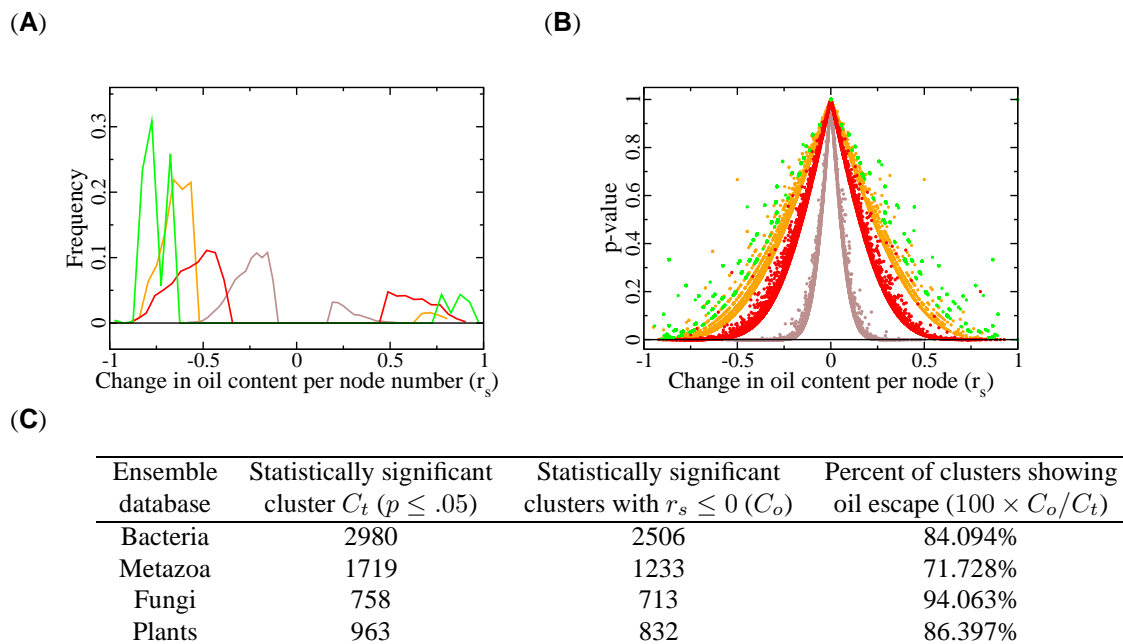

Figure S13: Similar to the analysis of homologous protein clusters within the cumulative database (Figs. 3B,C), analogous studies (the normalized distribution of the spearman correlation  $r_s$  within clusters that showed p-val  $< 0.05$ : **A**; **B** describes the scatter relationship between  $r_s$  and p-val for each cluster) where clusters were limited to one of four databases—Ensemble bacteria (grey), plants (green), metazoa (red), and fungi (orange)—resulted in qualitatively identical inferences (statistics in **C**): oil escape occurs dominantly even the individual databases. Clusters were only used if the change in oil content per node number ( $r_s$ ) is statistically significant (p-val  $< 0.05$ ).

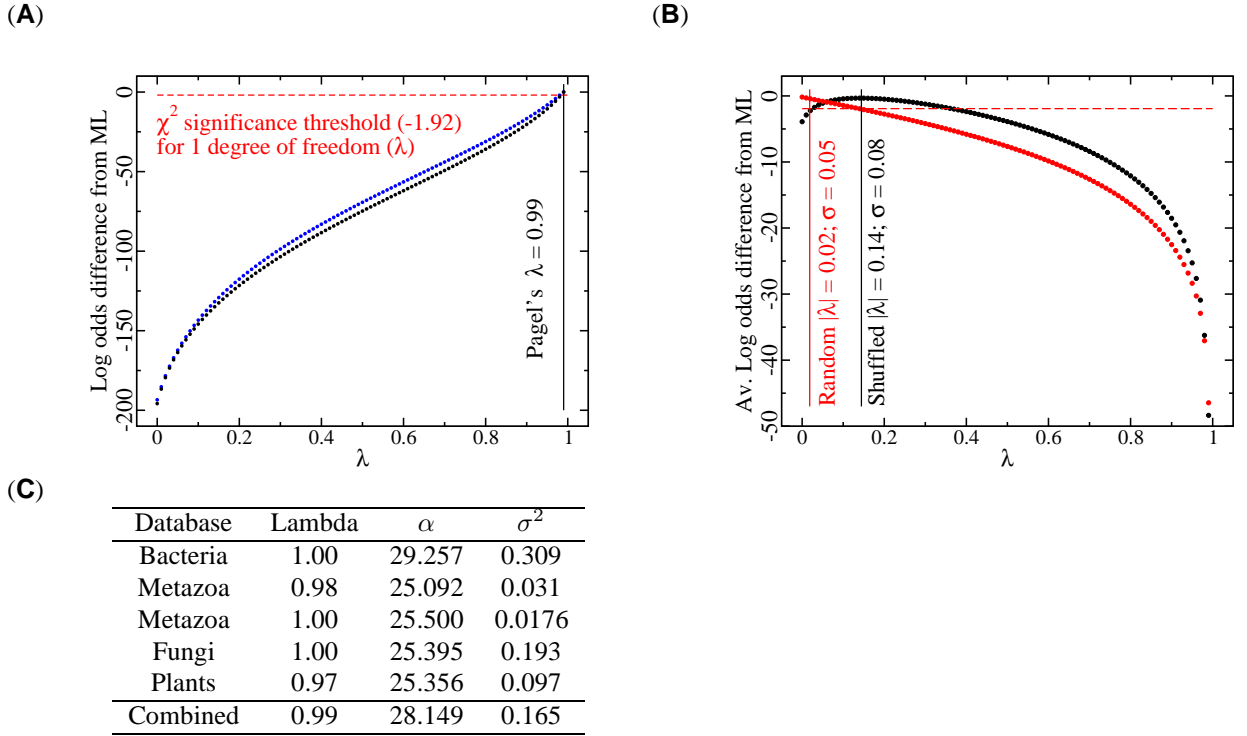

Figure S14: **Finding Pagel’s maximum likelihood  $\lambda$  for the original ToL (A), and the randomized ToL’s (B).** Pagel’s  $\lambda$  metric<sup>41,42</sup> is used to distinguish between whether, given a species tree, and a species trait (assigned for the leaves in the tree) is independent of phylogenetic relationships ( $\lambda = 0$ ) or dependent on the species’ genetic shared history ( $\lambda = 1$ ). Using the same methodology described in Figure 1 of Freckleton *et. al.*,<sup>42</sup> we find that the maximum likelihood (ML) probability of  $\lambda$  in our combined database (A), and our individual databases (C) indicate very high estimated  $\lambda$ ’s ( $\geq 0.97$ ). The  $\lambda = 0.99$  estimate for the original tree, with branch lengths of unit length (A; black circles), are also obtained for a “neutral drift” tree, where branch lengths were modified to ensure that all species-to-root lengths are equal (A; red circles). Also, the critical value of the log-likelihood ratio test (red dashed line; p-val= 0.05) indicates that the value of  $\lambda$  is significantly different from 0 (i.e., a non-phylogenetic explanation for the character trait, oil escape, is highly unlikely). As a control, we studied 1000 original trees whose species character trait values were (i) shuffled and (ii) randomized with a standard normal probability distribution ( $\mu = 1, \sigma^2 = 1$ ). Panel (B) describes the search for Pagel’s ML  $\lambda$ ’s for the shuffled (black) and randomized (red) trees, which resulted in estimated  $\lambda$  values of  $0.14 \pm 0.08$  and  $0.08 \pm 0.05$ , respectively.

**Calculating  $\lambda$ :** Each branch in the iTOL/NCBI tree used (See Section S6.2) is set to 1, which means that the “operational time” of this tree is in node numbers. A variance-covariance matrix  $\mathbf{V}$  of the tree (where diagonal elements  $\mathbf{V}_{i,i}$  were set to the node number of species  $i$ , and the off diagonal elements  $\mathbf{V}_{i,j}$  are the shared history (in node numbers) between the two species  $i$  and  $j$ .  $\mathbf{V}(\lambda)$  is a modification of  $\mathbf{V}$  by an off diagonal multiplier  $\lambda$  (normal  $\in [0, \dots, 1]$ ). At each value of  $\lambda$ , we calculate the likelihood of  $p(\lambda, \mathbf{y})$  (Equation 4 in Freckleton *et al.*<sup>42</sup>), which will end up giving us the most likely (ML)  $\lambda$  value. The  $x - axis$  in the graphs indicate the difference  $- [\ln(p(\lambda_0, \mathbf{y})/p(\lambda_1, \mathbf{y}))]$ , where  $\lambda_0$  is the maximum likelihood  $\lambda$ , and  $\lambda_1 \neq \lambda_0$  is the null hypothesis. Any difference  $- [\ln(p(\lambda_0, \mathbf{y})/p(\lambda_1, \mathbf{y}))]$  that is lower than the  $\chi^2$  significance cutoff (-0.92 or the red dashed line, which is obtained from precompiled tables setting p-val= 0.05 with one degree of freedom) indicate rejected values for  $\lambda$ .

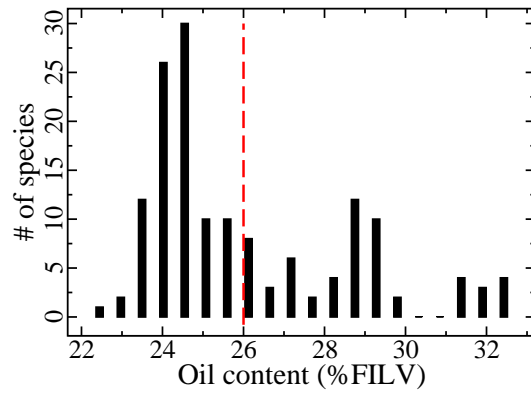

Figure S15: **Histogram distribution of proteome oil contents (number of bins: 20)**. Given the non-gaussian distribution around 26%FILV (red dashed line), the diffusion of evolving oil contents from an ancestral value of 26% is unlikely.

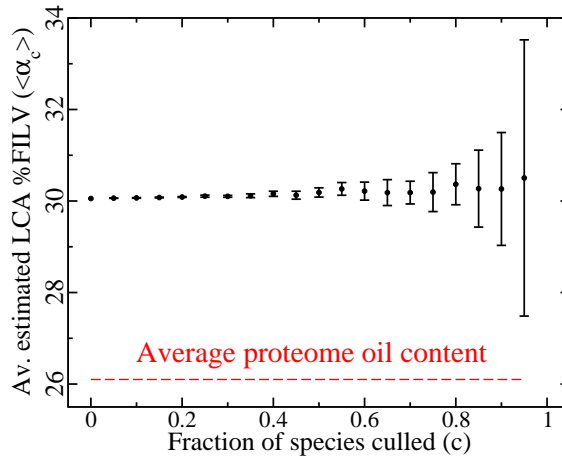

Figure S16: **Oil escape is robust to data culling.** For each culling fraction ( $C$ ), we obtained 100 species sets each amounting to a subset of the total number of species in our database. From each set, utilizing the original tree and the subset of oil contents per species, we obtained using a generalized least squares method<sup>43</sup> the estimated LCA’s oil content. For each  $C$ , the resulting 100 estimated ancestral oil contents were averaged and displayed above (with error bars representing variance). It appears as though our last common ancestor’s oil content is consistently predicted on average to be similar in value (between 30 and 30.5). While the mean is steady across testing parameters, the variance ( $\sigma^2$ ) of the estimation per  $C$  increases, but is remarkably low even with 70% of the species culled. This indicates that while the set of sequenced species is relatively low, the LCA’s oil content is consistently predicted to be higher than average (26.1). This study was repeated independently with no difference in inference.

**METHOD:**

**Set up for estimating the ancestral oil content:** Each branch in the iToL/NCBI tree used (See Section S6.2) is set to 1, which means that the “operational time” of this tree is in node numbers (an alternative tree was also used to model neutral drift). An  $n \times n$  variance-covariance matrix  $\mathbf{V}$  of the tree (where diagonal elements  $\mathbf{V}_{i,i}$  were set to the node number of species  $i$ , and the off diagonal elements  $\mathbf{V}_{i,j}$  are the shared history (in node numbers) between the two species  $i$  and  $j$  in our ToL). Let  $\mathbf{Y}_i$  be the  $n \times 1$  (column) vector of character states (oil contents), i.e., for any species  $i$ ,  $\mathbf{Y}_i$  is %*FILV* <sub>$i$</sub> . Finally, let  $\mathbf{T}$  be a  $n \times 2$  matrix whose first column elements all equal 1 and the second column elements depicts the species node number (i.e.,  $\mathbf{T}_{i,1} = 1$ ,  $\mathbf{T}_{i,2} = i$ ’s node number).

**Estimating the ancestral oil content:** Then, the model of evolution<sup>43</sup> for species  $i$  is  $\mathbf{Y}_i = \alpha + \beta \mathbf{T}_{i,2} + \epsilon_i$ , where  $\alpha$  is the character state of the ancestor at operational time 0 (i.e., the LCA),  $\beta$  is the estimated rate of change of the character state per operational time unit (e.g., node number), and  $\epsilon_i$  is the random error.<sup>43</sup> From a generalized least squares method,<sup>43</sup> we can estimate both  $\alpha$  and  $\beta$  by solving for  $(\beta, \alpha) = (\mathbf{T}^T \mathbf{V}^{-1} \mathbf{T})^{-1} (\mathbf{T}^T \mathbf{V}^{-1} \mathbf{Y})$ .

## S4 Statistics of the asymptotic nature of oil escape.

We use the following asymptotic form to fit the scatter plot (oil escape) described in Fig. 2B:

$$\%FILV = \phi_1 + (\phi_2 - \phi_1) e^{-e^{(\phi_3)} \ln(N)} \quad (2)$$

Here,  $N$  is its node number,  $\phi_1$  is the asymptote,  $\phi_2$  is the ordinate-intersect and  $\phi_3$  is the rate constant of the trend.

**Keeping all  $\phi$ 's variable**, and fitting to the data in Fig. 2B, we obtained the following values:  $r = 0.879$ ,  $\phi_1 = 23.91\%$ ,  $\phi_2 = 883.6$ ,  $\phi_3 = 0.89$ . Also, **constraining**  $\phi_1 = \%FILV^C$  still results in the following values:  $r = 0.877$ ,  $\phi_2 = 301.49$ ,  $\phi_3 = 0.62$ , which is higher than the corresponding monotonicity-based Spearman coefficient  $r_s$  of  $\sim 0.846$ .

## S5 The proteomes analyzed

The “proteomes” analyzed were annotated from genomes obtained from the Ensembl databases.<sup>44</sup> All species listed below (and in Table S2) were used to create Fig. 2A,B, Fig. 3 and Fig. S4, while only the italicized ones (those with first occurrence data in brackets available from pldb.org) were used to calculate Fig. 2C.

**Ensembl plants; release-4** [# of species: 7; genomes: 8]: *Arabidopsis lyrata*; *Arabidopsis thaliana*; *Brachypodium distachyon*; *Oryza sativa*; *Populus trichocarpa* (89.300 Ma); *Sorghum bicolor*; *Vitis vinifera* (99.600 Ma); **Ensembl fungi; release-4** [# of species: 11; genomes: 11]: *Aspergillus clavatus*; *Aspergillus flavus*; *Aspergillus fumigatus*; *Aspergillus niger*; *Aspergillus oryzae*; *Aspergillus terreus*; *Emericella nidulans*; *Neosartorya fischeri*; *Neurospora crassa*; *Saccharomyces cerevisiae*; *Schizosaccharomyces pombe*; **Ensembl metazoa; release-4** [# of species: 22; genomes: 22]: *Aedes aegypti* (37.200 Ma); *Anopheles gambiae* (23.030 Ma); *Caenorhabditis brenneri*; *Caenorhabditis briggsae*; *Caenorhabditis elegans*; *Caenorhabditis japonica*; *Caenorhabditis remanei*; *Culex quinquefasciatus* (37.200 Ma); *Drosophila ananassae* (23.030 Ma); *Drosophila erecta* (23.030 Ma); *Drosophila grimshawi* (23.030 Ma); *Drosophila melanogaster* (23.030 Ma); *Drosophila mojavensis* (23.030 Ma); *Drosophila persimilis* (23.030 Ma); *Drosophila pseudoobscura* (23.030 Ma); *Drosophila sechellia* (23.030 Ma); *Drosophila simulans* (23.030 Ma); *Drosophila virilis* (23.030 Ma); *Drosophila willistoni* (23.030 Ma); *Drosophila yakuba* (23.030 Ma); *Ixodes scapularis*; *Pediculus humanus*; **Ensembl main; release-57** [# of species: 51; genomes: 51]: *Anolis carolinensis* (20.430 Ma); *Bos taurus* (3.600 Ma); *Caenorhabditis elegans*; *Callithrix jacchus*; *Canis familiaris* (5.330 Ma); *Cavia porcellus* (1.810 Ma); *Choloepus hoffmanni* (0.011 Ma); *Ciona intestinalis*; *Ciona savignyi*; *Danio rerio*; *Dasyptus novemcinctus* (1.810 Ma); *Dipodomys ordii* (1.810 Ma); *Drosophila melanogaster* (23.030 Ma); *Echinops telfairi* (0.011 Ma); *Equus caballus* (7.250 Ma); *Erinaceus europaeus* (11.610 Ma); *Felis catus* (20.430 Ma); *Gallus gallus* (13.650 Ma); *Gasterosteus aculeatus* (1.810 Ma); *Gorilla gorilla*; *Homo sapiens* (7.250 Ma); *Lama pacos* (1.810 Ma); *Loxodonta africana* (11.610 Ma); *Macaca mulatta* (11.610 Ma); *Macropus eugenii* (5.330 Ma); *Meleagris gallopavo* (5.330 Ma); *Microcebus murinus* (0.011 Ma); *Monodelphis domestica* (1.810 Ma); *Mus musculus* (7.250 Ma); *Myotis lucifugus* (33.900 Ma); *Ochotona princeps* (11.610 Ma); *Ornithorhynchus anatinus* (0.011 Ma); *Oryctolagus cuniculus* (3.600 Ma); *Oryzias latipes*; *Otolemur garnettii* (1.810 Ma); *Pan troglodytes*; *Pongo pygmaeus* (1.810 Ma); *Procavia capensis* (7.250 Ma); *Pteropus vampyrus* (0.011 Ma); *Rattus norvegicus* (5.330 Ma); *Saccharomyces cerevisiae*; *Sorex araneus* (15.970 Ma); *Spermophilus tridecemlineatus* (13.650 Ma); *Sus scrofa* (13.650 Ma); *Taeniopygia guttata*; *Takifugu rubripes*; *Tarsius syrichta*; *Tetraodon nigroviridis* (7.250 Ma); *Tupaia belangeri*; *Tursiops truncatus* (20.430 Ma); *Xenopus tropicalis* (83.500 Ma); **Ensembl bacteria; release-4** [# of species: 60; genomes: 176]: **Bacillus**: *B. amyloqueliefaciens*; *B. anthracis*; *B. cereus*; *B. clausii*; *B. halodurans*; *B. licheniformis*; *B. pumilus*; *B. subtilis*; *B. thuringiensis*; *B. weihenstephanensis*; **Borrelia**: *B. afzelii*; *B. burgdorferi*; *B. duttonii*; *B. garinii*; *B. hermsii*; *B. recurrentis*; *B. turicatae*; **Escherichia**: *E. coli*; *E. fergusonii*; **Mycobacterium**: *M. abscessus*; *M. avium*; *M. bovis*; *M. gilvum*; *M. leprae*; *M. marinum*; *M. paratuberculosis*; *M. smegmatis*; *M. sp.*; *M. tuberculosis*; *M. ulcerans*; *M. vanbaalenii*; **Neisseria**: *N. gonorrhoeae*; *N. meningitidis*; **Pyrococcus**: *P. abyssi*; *P. furiosus*; *P. horikoshii*; **Shigella**: *S. boydii*; *S. dysenteriae*; *S. flexneri*; *S. sonnei*; **Staphylococcus**: *S. aureus*; *S. carnosus*; *S. epidermidis*; *S. haemolyticus*; *S. saprophyticus*; **Streptococcus**: *S. agalactiae*; *S. dysgalactiae*; *S. equi*; *S. gordonii*; *S. mutans*; *S. pneumoniae*; *S. pyogenes*; *S. sanguinis*; *S. suis*; *S. thermophilus*; *S. uberis*; **Wolbachia**: *W. pipientis*; *W. sp.*; **Others**: *Buchnera aphidicola*; *Thermococcus kodakarensis*.

Table S2: Ensembl genome species used in proteome analysis.

| #                   | Species                        | Node # | FILV          | hydrophobicity | hydrophilicity  |
|---------------------|--------------------------------|--------|---------------|----------------|-----------------|
| <b>Ensembl main</b> |                                |        |               |                |                 |
| 1                   | <i>Anolis carolinensis</i>     | 26     | 24.911121921  | -37.9224731411 | -0.560508853123 |
| 2                   | <i>Bos taurus</i>              | 28     | 24.8695814744 | -32.6894842967 | -2.189837377    |
| 3                   | <i>Caenorhabditis elegans</i>  | 15     | 25.3194997509 | -35.5108639787 | -1.5426787175   |
| 4                   | <i>Callithrix jacchus</i>      | 29     | 23.8884369539 | -40.7231414012 | 1.96419299624   |
| 5                   | <i>Canis familiaris</i>        | 27     | 24.583991022  | -35.2867980839 | -0.833873186611 |
| 6                   | <i>Cavia porcellus</i>         | 27     | 24.723829181  | -34.2894022262 | -1.13370593864  |
| 7                   | <i>Choloepus hoffmanni</i>     | 24     | 24.7554459523 | -38.4512700898 | 0.31720135025   |
| 8                   | <i>Ciona intestinalis</i>      | 16     | 25.3365449842 | -34.2299844742 | -2.72998068218  |
| 9                   | <i>Ciona savignyi</i>          | 16     | 25.7095193918 | -30.201364149  | -4.89951866011  |
| 10                  | <i>Danio rerio</i>             | 29     | 24.503101874  | -38.6693342081 | 1.18259983786   |
| 11                  | <i>Dasyptus novemcinctus</i>   | 24     | 24.4330223641 | -38.1913763293 | 0.687915187915  |
| 12                  | <i>Dipodomys ordii</i>         | 28     | 24.2240804182 | -38.0320355969 | 0.728464481919  |
| 13                  | <i>Drosophila melanogaster</i> | 36     | 23.159014235  | -44.93002556   | 4.92973342304   |
| 14                  | <i>Echinops telfairi</i>       | 25     | 24.1525410468 | -38.1842395841 | 0.953405354435  |
| 15                  | <i>Equus caballus</i>          | 26     | 24.5712428821 | -38.6189454203 | 0.907697729072  |

Continued on next page



**Table S2 – Ensembl species used in proteome analysis (continued)**

| #                       | Species                              | Node # | FILV          | hydrophobicity | hydrophilicity  |
|-------------------------|--------------------------------------|--------|---------------|----------------|-----------------|
| 16                      | <i>Erinaceus europaeus</i>           | 26     | 24.4693277214 | -37.7131916563 | 0.503128308006  |
| 17                      | <i>Felis catus</i>                   | 27     | 24.0689332433 | -38.742776961  | 1.19833648994   |
| 18                      | <i>Gallus gallus</i>                 | 31     | 24.4355771038 | -38.5150591055 | 0.936768904909  |
| 19                      | <i>Gasterosteus aculeatus</i>        | 37     | 24.4112204745 | -35.6972849699 | 0.359596745323  |
| 20                      | <i>Gorilla gorilla</i>               | 30     | 23.9035228754 | -40.1372309751 | 1.59182196113   |
| 21                      | <i>Homo sapiens</i>                  | 30     | 23.6964160418 | -41.4699769912 | 2.29085623766   |
| 22                      | <i>Loxodonta africana</i>            | 25     | 24.8028651582 | -34.5788163968 | -1.24563707322  |
| 23                      | <i>Macaca mulatta</i>                | 30     | 23.9922949938 | -40.3049329081 | 1.67539532823   |
| 24                      | <i>Macropus eugenii</i>              | 24     | 24.7163026725 | -37.2749993598 | -0.45170446957  |
| 25                      | <i>Meleagris gallopavo</i>           | 31     | 24.7414987456 | -37.8947459178 | 0.481045670043  |
| 26                      | <i>Microcebus murinus</i>            | 27     | 24.0916996464 | -38.7760286046 | 1.19442080717   |
| 27                      | <i>Monodelphis domestica</i>         | 25     | 24.2473052742 | -41.6562130423 | 0.805368641829  |
| 28                      | <i>Mus musculus</i>                  | 29     | 24.0321952599 | -39.3714201592 | 1.50666514033   |
| 29                      | <i>Myotis lucifugus</i>              | 26     | 24.0920547593 | -39.3157962755 | 1.47620280951   |
| 30                      | <i>Ochotona princeps</i>             | 26     | 24.1048232818 | -37.8446231597 | 1.03309945249   |
| 31                      | <i>Ornithorhynchus anatinus</i>      | 23     | 24.7482751061 | -36.3727526204 | -0.209309757986 |
| 32                      | <i>Oryctolagus cuniculus</i>         | 26     | 24.3000971515 | -36.6258167919 | 0.301933114886  |
| 33                      | <i>Oryzias latipes</i>               | 39     | 24.6934165372 | -36.0665477443 | 0.128224550015  |
| 34                      | <i>Otolemur garnettii</i>            | 27     | 24.4471734116 | -38.3705222972 | 0.617076618967  |
| 35                      | <i>Pan troglodytes</i>               | 30     | 23.8944048571 | -40.8676552352 | 1.98758067598   |
| 36                      | <i>Pongo pygmaeus</i>                | 30     | 24.0402683862 | -39.6970157197 | 1.3852391338    |
| 37                      | <i>Procuria capensis</i>             | 25     | 24.2151368758 | -38.2114295718 | 0.984775322929  |
| 38                      | <i>Pteropus vampyrus</i>             | 27     | 24.127981257  | -38.7617422245 | 1.2708565967    |
| 39                      | <i>Rattus norvegicus</i>             | 29     | 24.2843086452 | -38.0597885541 | 0.863121526983  |
| 40                      | <i>Saccharomyces cerevisiae</i>      | 13     | 26.2440278199 | -39.6793954764 | -0.869751279095 |
| 41                      | <i>Sorex araneus</i>                 | 26     | 24.5089856732 | -38.0386057345 | 0.790959255291  |
| 42                      | <i>Spermophilus tridecemlineatus</i> | 29     | 24.4514213736 | -38.2035364668 | 0.46397334998   |
| 43                      | <i>Sus scrofa</i>                    | 26     | 24.546984679  | -35.3082939549 | -0.794265615244 |
| 44                      | <i>Taeniopygia guttata</i>           | 32     | 24.6630333572 | -38.01887545   | 0.506469144419  |
| 45                      | <i>Takifugu rubripes</i>             | 37     | 24.4446391185 | -36.6941745333 | 0.110838545363  |
| 46                      | <i>Tarsius syrichta</i>              | 27     | 24.452207868  | -40.2918262635 | 1.32081597686   |
| 47                      | <i>Tetraodon nigroviridis</i>        | 37     | 24.4269330073 | -35.6378849719 | 0.335056032231  |
| 48                      | <i>Tupaia belangeri</i>              | 25     | 24.3837586502 | -38.8266371783 | 1.05518776781   |
| 49                      | <i>Tursiops truncatus</i>            | 27     | 23.9442746926 | -40.0516794233 | 1.96505311345   |
| 50                      | <i>Vicugna pacos</i>                 | 26     | 24.6166826812 | -39.9796275855 | 1.40056030051   |
| 51                      | <i>Xenopus tropicalis</i>            | 26     | 25.3023816966 | -31.7391849272 | -4.29862164922  |
| <b>Ensembl fungi</b>    |                                      |        |               |                |                 |
| 52                      | <i>Aspergillus clavatus</i>          | 16     | 23.8641230844 | -34.7521931111 | -0.320469244016 |
| 53                      | <i>Aspergillus flavus</i>            | 16     | 24.4225232971 | -31.1402197478 | -3.67368429775  |
| 54                      | <i>Aspergillus fumigatus</i>         | 16     | 23.9702886198 | -34.1271770178 | -0.94401115876  |
| 55                      | <i>Aspergillus nidulans</i>          | 15     | 23.9961385438 | -34.012094714  | -1.64567300129  |
| 56                      | <i>Aspergillus niger</i>             | 16     | 24.0051389055 | -32.3251790574 | -3.00194506058  |
| 57                      | <i>Aspergillus oryzae</i>            | 16     | 24.5685197236 | -30.3977940129 | -4.05280670219  |
| 58                      | <i>Aspergillus terreus</i>           | 16     | 23.9930725285 | -32.5761534583 | -2.15079615461  |
| 59                      | <i>Neosartorya fischeri</i>          | 15     | 23.9607788272 | -34.0869333039 | -1.13489174964  |
| 60                      | <i>Neurospora crassa</i>             | 16     | 22.1835811737 | -45.4575826101 | 5.05946474512   |
| 61                      | <i>Saccharomyces cerevisiae</i>      | 13     | 26.2437745288 | -39.6813468432 | -0.868582921567 |
| 62                      | <i>Schizosaccharomyces pombe</i>     | 12     | 26.6846065899 | -31.3851019399 | -5.16557277407  |
| <b>Ensembl bacteria</b> |                                      |        |               |                |                 |
| 63                      | <i>Bacillus amyloliquefaciens</i>    | 9      | 27.85501654   | -15.0819242125 | -9.81758115734  |
| 64                      | <i>Bacillus anthracis A0248</i>      | 9      | 29.4986580025 | -11.4001553892 | -14.6463412911  |

Continued on next page

**Table S2 – Ensembl species used in proteome analysis (continued)**

| #   | Species                           | Node # | FILV          | hydrophobicity | hydrophilicity |
|-----|-----------------------------------|--------|---------------|----------------|----------------|
| 65  | Bacillus anthracis Ames           | 9      | 29.5699411563 | -10.5736637175 | -15.1003651261 |
| 66  | Bacillus anthracis Ames ancestor  | 9      | 29.5210990185 | -11.4924203223 | -14.6281520554 |
| 67  | Bacillus anthracis CDC 684        | 9      | 29.4724616323 | -11.940155966  | -14.4445358971 |
| 68  | Bacillus anthracis Sterne         | 9      | 29.5622919136 | -10.6319323635 | -15.126900634  |
| 69  | Bacillus cereus 03BB102           | 8      | 29.4681897826 | -11.8920449463 | -14.4474911733 |
| 70  | Bacillus cereus AH187             | 8      | 29.3671142406 | -12.6276027932 | -14.075567435  |
| 71  | Bacillus cereus AH820             | 8      | 29.4279839747 | -12.2283765882 | -14.3222060772 |
| 72  | Bacillus cereus ATCC 10987        | 8      | 29.4501123612 | -12.2300770243 | -14.4033175099 |
| 73  | Bacillus cereus ATCC 14579        | 8      | 29.4117162356 | -12.2698292478 | -14.3385627207 |
| 74  | Bacillus cereus B4264             | 8      | 29.3393123828 | -12.6867195196 | -14.0871953545 |
| 75  | Bacillus cereus G9842             | 8      | 29.3223866005 | -13.7450882327 | -13.6068738981 |
| 76  | Bacillus cereus Q1                | 8      | 29.4113990844 | -12.2399194986 | -14.3690907152 |
| 77  | Bacillus cereus ZK                | 8      | 29.5406179507 | -11.6944822078 | -14.7284604812 |
| 78  | Bacillus cereus cytotoxis         | 8      | 29.3266684199 | -12.9183134485 | -13.0710242952 |
| 79  | Bacillus clausii                  | 8      | 28.4495139601 | -8.8787744915  | -14.0160116852 |
| 80  | Bacillus halodurans               | 8      | 28.8176917463 | -14.1254678688 | -12.1954859278 |
| 81  | Bacillus licheniformis Goettingen | 9      | 28.2007361755 | -14.981358507  | -10.0075138299 |
| 82  | Bacillus licheniformis Novozymes  | 9      | 28.1951264893 | -15.0456185584 | -10.0041365699 |
| 83  | Bacillus pumilus                  | 8      | 28.5640317247 | -15.1077055649 | -9.52951248371 |
| 84  | Bacillus subtilis                 | 8      | 28.2801556673 | -15.0337273743 | -10.4496306475 |
| 85  | Bacillus thuringiensis            | 9      | 29.374159023  | -12.0470844418 | -14.2602243975 |
| 86  | Bacillus thuringiensis konkukian  | 9      | 29.5692165726 | -10.9044837442 | -15.0148516891 |
| 87  | Bacillus weihenstephanensis       | 9      | 29.3154907109 | -13.2166579267 | -13.71164024   |
| 88  | Borrelia afzelii                  | 9      | 32.3179574012 | -18.309401867  | -10.6298180762 |
| 89  | Borrelia burgdorferi DSM 4680     | 8      | 31.6049439813 | -22.4622553157 | -8.65571344333 |
| 90  | Borrelia burgdorferi ZS7          | 8      | 31.778807605  | -21.1786146257 | -9.15901770789 |
| 91  | Borrelia duttonii                 | 8      | 31.4964132131 | -19.4612446246 | -7.95947977319 |
| 92  | Borrelia garinii                  | 9      | 32.0694659253 | -18.9486079026 | -9.97827435504 |
| 93  | Borrelia hermsii                  | 8      | 32.5175714619 | -12.2651417739 | -12.7888532291 |
| 94  | Borrelia recurrentis              | 8      | 32.4119934445 | -15.2231233029 | -11.1606403116 |
| 95  | Borrelia turicatae                | 8      | 32.691436181  | -11.9855468559 | -13.2291586778 |
| 96  | Buchnera aphidicola 5A            | 8      | 31.355978409  | -15.5151845592 | -10.7063409847 |
| 97  | Buchnera aphidicola Baizongia     | 8      | 32.1458761743 | -7.92588684584 | -15.1493114467 |
| 98  | Buchnera aphidicola Cinara        | 8      | 32.6307598337 | -17.6399220169 | -8.52384259453 |
| 99  | Buchnera aphidicola Schizaphis    | 8      | 31.6492264944 | -15.7515629996 | -9.93373102072 |
| 100 | Buchnera aphidicola Tokyo 1998    | 8      | 31.3512739158 | -15.3080531002 | -10.7281640969 |
| 101 | Buchnera aphidicola Tuc7          | 8      | 31.3797735559 | -15.4310387367 | -10.7227019766 |
| 102 | Escherichia coli 55989            | 8      | 27.3364411676 | -9.42039509602 | -11.6332958768 |
| 103 | Escherichia coli ATCC 27325       | 8      | 27.6466628226 | -6.83041711745 | -12.6950055283 |
| 104 | Escherichia coli ATCC 8739        | 8      | 27.6014450941 | -7.13915462728 | -12.3915646489 |
| 105 | Escherichia coli BL21             | 8      | 27.6380804675 | -6.37178923411 | -12.8254582193 |
| 106 | Escherichia coli BL21 DE3 JGI     | 8      | 27.673043372  | -6.20967920502 | -12.8968134289 |
| 107 | Escherichia coli BL21 DE3 KRIBB   | 8      | 27.6385446614 | -6.51833662521 | -12.8419443152 |
| 108 | Escherichia coli BW2952           | 8      | 27.6769451151 | -6.54268571287 | -12.7195721704 |
| 109 | Escherichia coli DH10B            | 8      | 27.6821301312 | -6.44435141799 | -12.8515051013 |
| 110 | Escherichia coli EC4115           | 8      | 27.1001214542 | -11.2126221115 | -10.6287867317 |
| 111 | Escherichia coli EDL933           | 8      | 27.0935574607 | -11.1557148498 | -10.8631392726 |
| 112 | Escherichia coli K12              | 8      | 27.5884491667 | -7.62283105405 | -11.8382248007 |
| 113 | Escherichia coli O103 H2 12009    | 8      | 27.1115975725 | -10.7952068166 | -10.728311188  |
| 114 | Escherichia coli O111 H 11128     | 8      | 27.1776551649 | -10.3005574771 | -10.8966649133 |
| 115 | Escherichia coli O127 H6          | 8      | 27.3845322443 | -8.8396188704  | -11.4144652082 |

Continued on next page

**Table S2 – Ensembl species used in proteome analysis (continued)**

| #   | Species                                      | Node # | FILV          | hydrophobicity  | hydrophilicity |
|-----|----------------------------------------------|--------|---------------|-----------------|----------------|
| 116 | <i>Escherichia coli</i> O139 H28             | 8      | 27.4258575666 | -9.28644107577  | -11.6502092512 |
| 117 | <i>Escherichia coli</i> O17 K52 H18          | 8      | 27.3856098302 | -8.68901937569  | -11.8634773844 |
| 118 | <i>Escherichia coli</i> O1 K1 APEC           | 8      | 27.3125690175 | -9.32485107286  | -11.5860073464 |
| 119 | <i>Escherichia coli</i> O26 H11 11368        | 8      | 26.9807996414 | -11.411979679   | -10.3923248372 |
| 120 | <i>Escherichia coli</i> O45 K1               | 8      | 27.3841411685 | -8.4009408743   | -11.8360932357 |
| 121 | <i>Escherichia coli</i> O6                   | 8      | 27.5142546966 | -8.07496808412  | -12.4112547635 |
| 122 | <i>Escherichia coli</i> O6 K15 H31           | 8      | 27.6258106238 | -6.98959320665  | -12.7731280192 |
| 123 | <i>Escherichia coli</i> O7 K1                | 8      | 27.3883613488 | -8.70979207634  | -12.0049408408 |
| 124 | <i>Escherichia coli</i> O8                   | 8      | 27.5599959177 | -7.18651221788  | -12.5637575086 |
| 125 | <i>Escherichia coli</i> O81                  | 8      | 27.224900381  | -9.55850076474  | -11.2917364639 |
| 126 | <i>Escherichia coli</i> O9 H4                | 8      | 27.6009144394 | -7.08140921912  | -12.3692307462 |
| 127 | <i>Escherichia coli</i> REL606               | 8      | 27.606253013  | -6.82563852271  | -12.7780714204 |
| 128 | <i>Escherichia coli</i> SE11                 | 8      | 27.3071173135 | -9.19007382723  | -11.6731120053 |
| 129 | <i>Escherichia coli</i> SMS 3 5              | 8      | 27.5670896155 | -7.58314694573  | -12.4408596888 |
| 130 | <i>Escherichia coli</i> Sakai                | 8      | 27.020919607  | -11.5316391864  | -10.6060115218 |
| 131 | <i>Escherichia coli</i> TW14359              | 8      | 27.0817161511 | -11.1632953174  | -10.6740842813 |
| 132 | <i>Escherichia coli</i> UTI89                | 8      | 27.4559989969 | -8.08044124787  | -12.1602120774 |
| 133 | <i>Escherichia fergusonii</i>                | 8      | 27.5917915973 | -7.21844921554  | -12.2541210218 |
| 134 | <i>Mycobacterium abscessus</i>               | 11     | 25.9996898455 | -2.1177680874   | -10.7845185681 |
| 135 | <i>Mycobacterium avium</i>                   | 10     | 25.3860476594 | -4.13531834632  | -8.69121085503 |
| 136 | <i>Mycobacterium bovis</i> AF2122 97         | 11     | 25.4587503269 | -0.319362422318 | -10.6557793287 |
| 137 | <i>Mycobacterium bovis</i> Pasteur 1173P2    | 11     | 25.4491090543 | -0.507553455985 | -10.4928268303 |
| 138 | <i>Mycobacterium bovis</i> Tokyo 172         | 11     | 25.4674245923 | -0.217655494252 | -10.6854978368 |
| 139 | <i>Mycobacterium gilvum</i>                  | 10     | 25.6142525632 | -3.22181035605  | -9.34828560706 |
| 140 | <i>Mycobacterium leprae</i> Br4923           | 10     | 26.9490732316 | 0.733300157092  | -11.0716606813 |
| 141 | <i>Mycobacterium leprae</i> TN               | 10     | 26.9424761594 | 0.695383724319  | -11.0594581951 |
| 142 | <i>Mycobacterium marinum</i>                 | 10     | 25.1005651725 | -0.410481563512 | -11.8273927736 |
| 143 | <i>Mycobacterium paratuberculosis</i>        | 12     | 25.3213637926 | -4.47713683867  | -8.14385908792 |
| 144 | <i>Mycobacterium smegmatis</i>               | 10     | 26.0278706169 | -1.26218395362  | -10.614461187  |
| 145 | <i>Mycobacterium</i> sp JLS                  | 12     | 25.7399387866 | -2.72064590493  | -9.57108846287 |
| 146 | <i>Mycobacterium</i> sp KMS                  | 12     | 25.5716454094 | -3.7759167687   | -9.0250897997  |
| 147 | <i>Mycobacterium</i> sp MCS                  | 12     | 25.6007066461 | -3.88815705582  | -8.90484084318 |
| 148 | <i>Mycobacterium tuberculosis</i> ATCC 25177 | 10     | 25.4762553312 | -0.386250592357 | -10.7448740098 |
| 149 | <i>Mycobacterium tuberculosis</i> CDC1551    | 10     | 25.3366309426 | -1.50767264771  | -10.0219164876 |
| 150 | <i>Mycobacterium tuberculosis</i> H37Rv      | 10     | 25.4344169459 | -0.449983568773 | -10.7581345804 |
| 151 | <i>Mycobacterium tuberculosis</i> KZN 1435   | 10     | 25.3983011673 | -0.66999753609  | -10.6751412282 |
| 152 | <i>Mycobacterium ulcerans</i>                | 10     | 25.509442272  | -1.2917212745   | -10.4748590851 |
| 153 | <i>Mycobacterium vanbaalenii</i>             | 10     | 25.7406410354 | -1.9485933759   | -9.94938047557 |
| 154 | <i>Neisseria gonorrhoeae</i> ATCC 700825     | 8      | 26.4666886162 | -15.9843921017  | -6.6731328807  |
| 155 | <i>Neisseria gonorrhoeae</i> NCCP11945       | 8      | 26.1615127142 | -17.8691549683  | -6.07764650047 |
| 156 | <i>Neisseria meningitidis</i> 2a             | 8      | 26.7124669908 | -15.1713200049  | -7.57035202315 |
| 157 | <i>Neisseria meningitidis</i> A              | 8      | 26.7469828899 | -14.5504882344  | -7.62974361129 |
| 158 | <i>Neisseria meningitidis</i> B              | 8      | 26.5827362823 | -15.8470198797  | -7.01355064371 |
| 159 | <i>Neisseria meningitidis</i> C              | 8      | 26.6792184179 | -15.8759645015  | -7.24744980754 |
| 160 | <i>Neisseria meningitidis</i> alpha14        | 8      | 26.7144884824 | -14.1643706155  | -7.86624458407 |
| 161 | <i>Pyrococcus abyssi</i>                     | 8      | 31.1843179457 | -7.08909752115  | -15.6560969274 |
| 162 | <i>Pyrococcus furiosus</i>                   | 8      | 31.1161186511 | -7.66337960714  | -16.8295552822 |
| 163 | <i>Pyrococcus horikoshii</i>                 | 8      | 31.2987471853 | -4.49751177315  | -18.1293034195 |
| 164 | <i>Pyrococcus kodakaraensis</i>              | 8      | 30.0555655697 | -9.4829502261   | -16.0938893548 |
| 165 | <i>Shigella boydii</i> 18                    | 8      | 27.2142530954 | -11.3714976956  | -10.2537075602 |
| 166 | <i>Shigella boydii</i> 4                     | 8      | 27.1342134435 | -11.7127400988  | -10.4534838255 |

Continued on next page

**Table S2 – Ensembl species used in proteome analysis (continued)**

| #   | Species                                      | Node # | FILV          | hydrophobicity | hydrophilicity |
|-----|----------------------------------------------|--------|---------------|----------------|----------------|
| 167 | <i>Shigella dysenteriae</i>                  | 8      | 27.1307699427 | -11.8266043757 | -10.4986049652 |
| 168 | <i>Shigella flexneri</i> 2457T               | 8      | 27.350651336  | -9.39475185061 | -11.2576340575 |
| 169 | <i>Shigella flexneri</i> 301                 | 8      | 27.2479921706 | -10.7602954655 | -10.9015503394 |
| 170 | <i>Shigella flexneri</i> 5b                  | 8      | 27.3027949223 | -10.0203509812 | -11.2748831447 |
| 171 | <i>Shigella sonnei</i>                       | 8      | 27.138563728  | -12.0687190499 | -10.3104876608 |
| 172 | <i>Staphylococcus aureus</i> COL             | 8      | 28.9294768083 | -19.9979904987 | -8.13228444234 |
| 173 | <i>Staphylococcus aureus</i> JH1             | 8      | 28.7975749823 | -21.1840830034 | -7.6111394961  |
| 174 | <i>Staphylococcus aureus</i> JH9             | 8      | 28.7657199639 | -21.3796305178 | -7.48768351743 |
| 175 | <i>Staphylococcus aureus</i> MRSA252         | 8      | 28.9606936827 | -20.270798557  | -8.0584039007  |
| 176 | <i>Staphylococcus aureus</i> MSSA476         | 8      | 29.157092472  | -18.6544847681 | -8.93949891895 |
| 177 | <i>Staphylococcus aureus</i> MW2             | 8      | 28.9721395348 | -19.9738280094 | -8.23631274767 |
| 178 | <i>Staphylococcus aureus</i> Mu3             | 8      | 28.8625054366 | -20.7819161332 | -7.83475130197 |
| 179 | <i>Staphylococcus aureus</i> Mu50            | 8      | 28.8391476942 | -21.1169632588 | -7.72261726624 |
| 180 | <i>Staphylococcus aureus</i> N315            | 8      | 28.9346908684 | -20.1846908684 | -8.02533302827 |
| 181 | <i>Staphylococcus aureus</i> NCTC 8325       | 8      | 29.0035903496 | -19.6690819321 | -8.48674525042 |
| 182 | <i>Staphylococcus aureus</i> Newman          | 8      | 28.8570136801 | -20.6767393774 | -7.9290660408  |
| 183 | <i>Staphylococcus aureus</i> TCH1516         | 8      | 28.9864439512 | -20.0596559217 | -8.2246320141  |
| 184 | <i>Staphylococcus aureus</i> USA300          | 8      | 28.8347858419 | -21.1750999254 | -7.59586179522 |
| 185 | <i>Staphylococcus aureus</i> bovine RF122    | 8      | 29.2776419721 | -17.4810887345 | -9.59254664462 |
| 186 | <i>Staphylococcus carnosus</i>               | 8      | 28.5407270884 | -20.7632802456 | -8.11587945891 |
| 187 | <i>Staphylococcus epidermidis</i> ATCC 12228 | 8      | 28.9830710958 | -23.156899811  | -7.32528935145 |
| 188 | <i>Staphylococcus epidermidis</i> ATCC 35984 | 8      | 28.8372144502 | -24.1301520719 | -7.0507155348  |
| 189 | <i>Staphylococcus haemolyticus</i>           | 8      | 28.7224171069 | -23.16678801   | -7.65482952886 |
| 190 | <i>Staphylococcus saprophyticus</i>          | 8      | 29.3776243699 | -15.4152821542 | -11.0897335866 |
| 191 | <i>Streptococcus agalactiae</i> III          | 8      | 29.0780659107 | -16.6998698048 | -8.6786661432  |
| 192 | <i>Streptococcus agalactiae</i> Ia           | 8      | 29.0831201773 | -15.8152950577 | -9.18246536864 |
| 193 | <i>Streptococcus agalactiae</i> V            | 8      | 29.1739192743 | -15.6395310455 | -9.22834402238 |
| 194 | <i>Streptococcus dysgalactiae</i>            | 8      | 28.8210481396 | -12.8654291201 | -9.40922743611 |
| 195 | <i>Streptococcus equi</i>                    | 9      | 28.1563856885 | -18.3003226828 | -5.73669345792 |
| 196 | <i>Streptococcus equi</i> MGCS10565          | 9      | 28.5517874332 | -13.1874443192 | -8.03343807753 |
| 197 | <i>Streptococcus equi</i> zoepidemicus       | 9      | 28.5047932853 | -14.5919266702 | -7.63778152924 |
| 198 | <i>Streptococcus gordonii</i>                | 8      | 28.78322989   | -16.1949372724 | -9.06158494725 |
| 199 | <i>Streptococcus mutans</i> ATCC 700610      | 8      | 29.222736078  | -14.7393279088 | -9.12366981593 |
| 200 | <i>Streptococcus mutans</i> NN2025           | 8      | 29.1993985864 | -14.563478582  | -8.98754488389 |
| 201 | <i>Streptococcus pneumoniae</i> 19F          | 8      | 29.1338649059 | -15.2945709117 | -10.2178278588 |
| 202 | <i>Streptococcus pneumoniae</i> 2            | 8      | 29.1482561203 | -14.5111692599 | -10.5450985213 |
| 203 | <i>Streptococcus pneumoniae</i> 70585        | 8      | 28.9877835951 | -15.3131575084 | -10.1257849326 |
| 204 | <i>Streptococcus pneumoniae</i> ATCC 700669  | 8      | 28.9424572572 | -15.6840898348 | -9.93357747686 |
| 205 | <i>Streptococcus pneumoniae</i> ATCC BAA 255 | 8      | 29.1319221541 | -14.9510525948 | -10.3670246551 |
| 206 | <i>Streptococcus pneumoniae</i> CGSP14       | 8      | 28.911957785  | -16.1371674467 | -9.8723654867  |
| 207 | <i>Streptococcus pneumoniae</i> Hungary19A 6 | 8      | 28.7770075279 | -16.2049861047 | -9.73195195497 |
| 208 | <i>Streptococcus pneumoniae</i> JJA          | 8      | 29.0611822349 | -15.8073468589 | -9.7979588499  |
| 209 | <i>Streptococcus pneumoniae</i> P1031        | 8      | 29.0296853473 | -15.7920057505 | -9.82007376411 |
| 210 | <i>Streptococcus pneumoniae</i> TIGR4        | 8      | 28.9770706691 | -14.6197167651 | -10.6066517992 |
| 211 | <i>Streptococcus pneumoniae</i> Taiwan19F 14 | 8      | 29.043539862  | -15.590234911  | -9.96774315574 |
| 212 | <i>Streptococcus pyogenes</i> ATCC BAA 595   | 8      | 28.5611510791 | -15.4267662793 | -7.54964028777 |
| 213 | <i>Streptococcus pyogenes</i> M18            | 8      | 28.6063556003 | -15.2404423557 | -7.56023647011 |
| 214 | <i>Streptococcus pyogenes</i> M2             | 8      | 28.6230622387 | -15.4824291191 | -7.91495904384 |
| 215 | <i>Streptococcus pyogenes</i> M28            | 8      | 28.6762559477 | -15.2023673994 | -7.80422614356 |
| 216 | <i>Streptococcus pyogenes</i> M4             | 8      | 28.6292537504 | -15.855194273  | -7.76768651795 |
| 217 | <i>Streptococcus pyogenes</i> M49            | 8      | 28.7203476732 | -14.0917818253 | -8.23215977343 |

Continued on next page

**Table S2 – Ensembl species used in proteome analysis (continued)**

| #                      | Species                                        | Node # | FILV          | hydrophobicity | hydrophilicity  |
|------------------------|------------------------------------------------|--------|---------------|----------------|-----------------|
| 218                    | <i>Streptococcus pyogenes</i> M5               | 8      | 28.7053738756 | -13.9786942466 | -8.17755184908  |
| 219                    | <i>Streptococcus pyogenes</i> M6               | 8      | 28.5637117602 | -15.0463424393 | -7.83416390819  |
| 220                    | <i>Streptococcus pyogenes</i> MGAS2096         | 8      | 28.6385550652 | -15.0984239567 | -8.01238081474  |
| 221                    | <i>Streptococcus pyogenes</i> MGAS5005         | 8      | 28.7599483414 | -13.8767757636 | -8.45209574611  |
| 222                    | <i>Streptococcus pyogenes</i> MGAS9429         | 8      | 28.6891690743 | -14.8517758325 | -7.99123709704  |
| 223                    | <i>Streptococcus pyogenes</i> SF370            | 8      | 28.6920272995 | -14.3840739879 | -8.00622382503  |
| 224                    | <i>Streptococcus pyogenes</i> SSI 1            | 8      | 28.5991325655 | -14.9491313488 | -7.76825608973  |
| 225                    | <i>Streptococcus sanguinis</i>                 | 8      | 28.5025053138 | -16.18229654   | -8.62194254462  |
| 226                    | <i>Streptococcus suis</i> 05ZYH33              | 8      | 28.8876003656 | -13.8642595304 | -10.6824041224  |
| 227                    | <i>Streptococcus suis</i> 98HAH33              | 8      | 28.9039681514 | -13.7619632785 | -10.7222555842  |
| 228                    | <i>Streptococcus suis</i> BM407                | 8      | 28.996449367  | -13.5965063362 | -10.6313966044  |
| 229                    | <i>Streptococcus suis</i> P1 7                 | 8      | 29.042135322  | -12.1384438734 | -11.2804982371  |
| 230                    | <i>Streptococcus suis</i> SC84                 | 8      | 29.0531469502 | -12.7263354456 | -11.030891358   |
| 231                    | <i>Streptococcus thermophilus</i> ATCC BAA 250 | 8      | 29.1033668096 | -14.1253261448 | -9.61390512702  |
| 232                    | <i>Streptococcus thermophilus</i> ATCC BAA 491 | 8      | 29.0077539258 | -15.2604575005 | -8.85208687592  |
| 233                    | <i>Streptococcus thermophilus</i> CNRZ 1066    | 8      | 29.1330046044 | -13.7285917992 | -9.86273933536  |
| 234                    | <i>Streptococcus uberis</i>                    | 8      | 29.3281000904 | -12.5494159216 | -10.3750407876  |
| 235                    | <i>Wolbachia pipientis</i> Culex pipiens       | 9      | 29.3157168798 | -20.7267779354 | -6.78180537226  |
| 236                    | <i>Wolbachia pipientis</i> wMel                | 9      | 29.4057565118 | -17.8689893242 | -7.944602012    |
| 237                    | <i>Wolbachia</i> sp Brugia malayi              | 9      | 30.0708576941 | -12.5685914122 | -10.1222544723  |
| 238                    | <i>Wolbachia</i> sp Drosophila simulans        | 9      | 29.2841799648 | -19.4198927582 | -7.20812509039  |
| <b>Ensembl plants</b>  |                                                |        |               |                |                 |
| 239                    | <i>Arabidopsis lyrata</i>                      | 18     | 25.9907926953 | -30.4142522607 | -3.2884463922   |
| 240                    | <i>Arabidopsis thaliana</i>                    | 18     | 25.9178308516 | -31.7059868556 | -2.97277754913  |
| 241                    | <i>Brachypodium distachyon</i>                 | 19     | 24.4235321738 | -26.775790694  | -2.18583027399  |
| 242                    | <i>Oryza indica</i>                            | 19     | 24.0456993665 | -26.5602535336 | -2.00789982733  |
| 243                    | <i>Oryza sativa</i>                            | 19     | 23.6643839517 | -35.5393019989 | 1.43353694282   |
| 244                    | <i>Populus trichocarpa</i>                     | 19     | 26.1394154193 | -26.0388987149 | -5.24728272092  |
| 245                    | <i>Sorghum bicolor</i>                         | 19     | 24.2594019763 | -27.1851305205 | -2.13916519236  |
| 246                    | <i>Vitis vinifera</i>                          | 18     | 26.8442144126 | -22.0186390724 | -8.49252677916  |
| <b>Ensembl metazoa</b> |                                                |        |               |                |                 |
| 247                    | <i>Aedes aegypti</i>                           | 29     | 24.5280294153 | -40.7636544656 | 1.50490256636   |
| 248                    | <i>Anopheles gambiae</i>                       | 29     | 24.1510817843 | -36.7226307329 | -0.013704142103 |
| 249                    | <i>Caenorhabditis brenneri</i>                 | 15     | 25.0582856857 | -40.3114852103 | 0.199652933964  |
| 250                    | <i>Caenorhabditis briggsae</i>                 | 15     | 25.3067565977 | -37.3168267839 | -1.33862650986  |
| 251                    | <i>Caenorhabditis elegans</i>                  | 15     | 25.3194997509 | -35.5108639787 | -1.5426787175   |
| 252                    | <i>Caenorhabditis japonica</i>                 | 15     | 25.4299465184 | -33.8231826163 | -1.40736059401  |
| 253                    | <i>Caenorhabditis remanei</i>                  | 15     | 25.9102670775 | -35.8447632606 | -2.5612766037   |
| 254                    | <i>Culex quinquefasciatus</i>                  | 29     | 24.3522910512 | -39.5859710914 | 1.93985037954   |
| 255                    | <i>Drosophila ananassae</i>                    | 37     | 23.4053095693 | -43.5362820753 | 3.82133629176   |
| 256                    | <i>Drosophila erecta</i>                       | 36     | 23.4657460297 | -42.5538112401 | 3.73887568958   |
| 257                    | <i>Drosophila grimshawi</i>                    | 38     | 23.337972338  | -42.9033783942 | 4.18711643623   |
| 258                    | <i>Drosophila melanogaster</i>                 | 36     | 23.159014235  | -44.93002556   | 4.92973342304   |
| 259                    | <i>Drosophila mojavensis</i>                   | 37     | 23.2723307924 | -43.237610704  | 4.13540973514   |
| 260                    | <i>Drosophila persimilis</i>                   | 36     | 23.3198166961 | -42.1465045041 | 3.5079096259    |
| 261                    | <i>Drosophila pseudoobscura</i>                | 36     | 23.1283195518 | -43.1236422382 | 3.94878907959   |
| 262                    | <i>Drosophila sechellia</i>                    | 36     | 23.5496499297 | -42.3297911341 | 3.47842458723   |
| 263                    | <i>Drosophila simulans</i>                     | 36     | 23.7352164513 | -41.0545267776 | 2.62127455847   |
| 264                    | <i>Drosophila virilis</i>                      | 35     | 23.3085895285 | -42.2995975802 | 3.80200595997   |
| 265                    | <i>Drosophila willistoni</i>                   | 36     | 23.3910162696 | -44.2478190693 | 3.88596914514   |
| 266                    | <i>Drosophila yakuba</i>                       | 36     | 23.4816851308 | -42.7046155019 | 3.56122272399   |

Continued on next page

**Table S2 – Ensembl species used in proteome analysis (continued)**

| <b>#</b> | <b>Species</b>    | <b>Node #</b> | <b>FILV</b>   | <b>hydrophobicity</b> | <b>hydrophilicity</b> |
|----------|-------------------|---------------|---------------|-----------------------|-----------------------|
| 267      | Ixodes scapularis | 20            | 24.8213847617 | -28.826774208         | -2.26774173639        |
| 268      | Pediculus humanus | 23            | 25.3323742457 | -47.9811410337        | 2.7897692826          |



## S6.2 THE COMMON TREE USED TO CALCULATE NODE SPACE

The following “tree” in newick format was obtained from iTol’s NCBI algorithm. Each bracket pair indicates an additional node that separates the species (or group of species) from the last common ancestor. The node number of a species in Fig. 2 onwards is the number of brackets that the species is embedded into.

```
((((( Thermococcus kodakarensis) Thermococcus, ( Pyrococcus horikoshii, Pyrococcus furiosus, Pyrococcus abyssi) Pyrococcus) Thermococaceae) Thermococcales) Thermococci) Euryarchaeota) Archaea, (((((( Borrelia duttonii, ( Borrelia afzelii, Borrelia garinii, Borrelia burgdorferi) Borrelia burgdorferi group, Borrelia turicatae, Borrelia hermsii, Borrelia recurrentis) Borrelia) Spirochaetaceae) Spirochaetales) Spirochaetes —class—) Spirochaetes, (((((( Bacillus clausii, Bacillus pumilus, ( Bacillus licheniformis, Bacillus subtilis, Bacillus amyloliquefaciens) Bacillus subtilis group, ( Bacillus weihenstephanensis, Bacillus anthracis, Bacillus thuringiensis, Bacillus cereus) Bacillus cereus group, Bacillus halodurans) Bacillus) Bacillaceae, (( Staphylococcus saprophyticus, Staphylococcus epidermidis, Staphylococcus carnosus, Staphylococcus haemolyticus, Staphylococcus aureus) Staphylococcus) Staphylococaceae) Bacillales, (( Streptococcus thermophilus, Streptococcus pyogenes, Streptococcus gordonii, Streptococcus sanguinis, Streptococcus uberis, Streptococcus pneumoniae, Streptococcus agalactiae, Streptococcus suis, Streptococcus mutans, ( Streptococcus equi, Streptococcus dysgalactiae) Streptococcus dysgalactiae group) Streptococcus) Streptococaceae) Lactobacillales) Bacilli) Firmicutes, (((((( ( Wolbachia pipiensis) Wolbachia) Wolbachiae) Rickettsiaceae) Rickettsiales) Alphaproteobacteria, (((((( Buchnera aphidicola) Buchnera, ( Shigella boydii, Shigella flexneri, Shigella sonnei, Shigella dysenteriae) Shigella, ( Escherichia fergusonii, Escherichia coli) Escherichia) Enterobacteriaceae) Enterobacteriales) Gammaproteobacteria, (((((( Neisseria meningitidis, Neisseria gonorrhoeae) Neisseria) Neisseriaceae) Neisseriales) Betaproteobacteria) Proteobacteria, (((((( Mycobacterium marinum, ( Mycobacterium avium subsp. paratuberculosis) Mycobacterium avium) Mycobacterium avium complex —MAC—, Mycobacterium leprae, Mycobacterium vanbaalenii, Mycobacterium smegmatis, Mycobacterium gilvum, ( Mycobacterium abscessus) Mycobacterium abscessus subgroup) Mycobacterium chelonae group, ( Mycobacterium tuberculosis, Mycobacterium bovis) Mycobacterium tuberculosis complex, Mycobacterium ulcerans) Mycobacterium) Mycobacteriaceae) Corynebacterineae) Actinomycetales) Actinobacteridae) Actinobacteria —class—) Actinobacteria) Bacteria, (((((( Dictyostelium discoideum) Dictyostelium) Dictyostelida) Mycetozoa) Amoebozoa, ((((((((((( Sorghum bicolor) Sorghum) Andropogoneae) Panicoideae) PACCAD clade, ((( Oryza sativa) Oryza) Oryzaceae) Ehrhartioideae, ((( Brachypodium distachyon) Brachypodium) Brachypodiaceae) Poioideae) BEP clade) Poaceae) Poales) commelinids) Liliopsida, (((((( Vitis vinifera) Vitis) Vitaceae) Vitales) rosids incertae sedis, ((( Populus trichocarpa) Populus) Salicaceae) Salicaceae) Malpighiales) fabids, ((( Arabidopsis lyrata, Arabidopsis thaliana) Arabidopsis) Brassicaceae) Brassicales) malvids) rosids) core eudicotyledons) eudicotyledons) Magnoliophyta) Spermatophyta) Euphyllophyta) Tracheophyta) Embryophyta) Streptophyta) Streptophyta) Viridiplantae, (((((( Plasmodium knowlesi, Plasmodium vivax) Plasmodium —Plasmodium—, ( Plasmodium falciparum) Plasmodium —Laverania—) Plasmodium) Haemosporida) Aconoidasida) Apicomplexa) Alveolata, ((((((( Caenorhabditis elegans, Caenorhabditis remanei, Caenorhabditis japonica, Caenorhabditis briggsae, Caenorhabditis brenneri) Caenorhabditis) Peloderinae) Rhabditidae) Rhabditioidea) Rhabditida) Chromadorea) Nematoda) Pseudocoelomata, ((((((( Ciona savignyi, Ciona intestinalis) Ciona) Cionidae) Phlebobranchia) Enterogona) Ascidiacea) Tunicata, ((((((((((( Tetraodon nigroviridis) Tetraodon, ( Takifugu rubripes) Takifugu) Tetraodontidae) Tetraodontoidea) Tetraodontoidei) Tetraodontiformes, ((( Gasterosteus aculeatus) Gasterosteus) Gasterosteidae) Gasterosteiformes) Gasterosteiformes) Syngnathiformes group, ((( Oryzias latipes) Oryzias) Oryziinae) Adrianiichthyidae) Adrianiichthyoidei) Beloniformes) Atherinomorpha) Smegmamorpha) Percormorpha) Euacanthopterygii) Acanthopterygii) Holacanthopterygii) Euacanthomorpha) Acanthomorpha) Ctenosquamata) Eurypterygii) Neoteleostei) Neognathi) Euteleostei, (((((( Danio rerio) Danio) Cyprinidae) Cyprinoidea) Cypriniformes) Cypriniphysi) Otophysi) Ostariophysi) Otocephala) Cluipocephala) Elopocephala) Teleostei) Neopterygii) Actinopteri) Actinopterygii, ((((((( Xenopus —Silurana— tropicalis) Silurana) Xenopus) Xenopodinae) Pipidae) Pipioidea) Mesobatrachia) Anura) Batrachia) Amphibia, ((((((( Tarsius syrichta) Tarsius) Tarsiidae) Tarsiiformes, ((( Homo sapiens) Homo, ( Gorilla gorilla) Gorilla, ( Pan troglodytes) Pan) Homininae, ( Pongo pygmaeus) Pongo) Ponginae) Hominidae) Hominoidae, ((( Macaca mulatta) Macaca) Cercopitheciae) Cercopithecoidea) Catarrhini, ((( Callithrix jacchus) Callithrix) Callitrichinae) Cebidae) Platyrrhini) Simiiformes) Haplorhini, ((( Microcebus murinus) Microcebus) Cheirogaleidae) Lemuriformes, ((( Otolomur garnettii) Otolomur) Galagidae) Lorisiiformes) Strepsirrhini) Primates, ((( Oryctolagus cuniculus) Oryctolagus) Leporidae, (( Ochotona princeps) Ochotona) Ochotonidae) Lagomorpha, ((( ( Spermophilus tridecemlineatus) Spermophilus) Marmotini) Xerinae) Sciuridae, ((( Mus musculus) Mus, ( Rattus norvegicus) Rattus) Murinae) Muridae) Muroidea, ((( Dipodomys ordii) Dipodomys) Dipodomysinae) Heteromyidae) Sciurognathi, ((( Cavia porcellus) Cavia) Caviidae) Hystricognathi) Rodentia) Glires, ((( Tupaia belangeri) Tupaia) Tupaiidae) Scandentia) Euarchontoglires, ((( Dasylops novemcinctus) Dasylops) Dasylopidae, ( Choleopus hoffmanni) Choleopus) Megalonychidae) Xenarthra, ((( Equus caballus) Equus subg. Equus) Equus) Equidae) Perissodactyla, ((( Erinaceus europaeus) Erinaceus) Erinaceinae) Erinaceidae, (( Sorex araneus) Sorex) Soricinae) Soricidae) Insectivora, ((( Bos taurus) Bos) Bovinae) Bovidae) Pecora) Ruminantia, (( Lama pacos) Lama) Camelidae) Tylopoda, ((( Tursiops truncatus) Tursiops) Delphinidae) Odontoceti) Cetacea, (( Sus scrofa) Sus) Suidae) Suina) Cetartiodactyla, ((( Pteropus vampyrus) Pteropus) Pteropodinae) Pteropodidae) Megachiroptera, ((( Myotis lucifugus) Myotis) Vespertilionidae) Microchiroptera) Chiroptera, ((( Felis catus) Felis) Felinae) Felidae) Feliformia, ((( Canis lupus familiaris) Canis lupus) Canis) Canidae) Caniformia) Carnivora) Laurasiatheria, ((( Echinops telfairi) Echinops) Tenrecinae) Tenrecidae, (( Procavia capensis) Procavia) Procaviidae) Hyracoidea, ((( Loxodonta africana) Loxodonta) Elephantidae) Proboscidea) Afrotheria) Eutheria, ((( Macropus eugenii) Macropus) Macropodidae) Diprotodontia, ((( Monodelphis domestica) Monodelphis) Didelphinae) Didelphidae) Didelphimorphia) Metatheria) Theria, ((( Ornithorhynchus anatinus) Ornithorhynchus) Ornithorhynchidae) Monotremata) Prototheria) Mammalia, ((((((( Taeniopygia guttata) Taeniopygia) Estrildinae) Estrildidae) Passeroidea) Passeriformes, ((( Gallus gallus) Gallus) Phasianinae, (( Meleagris gallopavo) Meleagris) Meleagridinae) Phasianidae) Galliformes) Neognathae) Aves) Coelurosauria) Theropoda) Saurischia) Dinosauria) Archosauria, ((( Anolis carolinensis) Anolis) Polychrotinae) Iguanidae) Iguania) Squamata) Lepidosauria) Sauria) Sauropsida) Amniota) Tetrapoda) Sarcopterygii) Euteleostomi) Teleostomi) Gnathostomata) Vertebrata) Craniata) Chordata) Deuterostomia, ((((((((((( Drosophila pseudoobscura, Drosophila persimilis) pseudoobscura subgroup) obscura group, ( Drosophila willistoni) willistoni subgroup) willistoni group, (( Drosophila ananassae) ananassae species complex) ananassae subgroup, ( Drosophila erecta, Drosophila yakuba, Drosophila sechellia, Drosophila melanogaster, Drosophila simulans) melanogaster subgroup) melanogaster group) Sophophora, ((( Drosophila grimshawi) grimshawi subgroup) grimshawi group) grimshawi clade) picture wing clade) Hawaiian Drosophila, ((( Drosophila mojavensis) mojavensis species complex) mulleri subgroup) repleta group, ( Drosophila virilis) virilis group) Drosophila) Drosophila) Drosophilini) Drosophilina) Drosophilini) Drosophilinae) Drosophilidae) Ephydroidea) Acalyptratae) Schizophora) Cyclorhapha) Eremoneura) Muscomorpha) Brachycera, ((((((( Anopheles gambiae) gambiae species complex) Pyretophorus) Cellia) Anopheles) Anophelinae, ((( Aedes aegypti) Stegomyia) Aedes) Aedes/Ochlerotatus group, (( Culex quinquefasciatus) Culex pipiens complex) Culex) Culex) Culicini) Culicinae) Culicidae) Culicoidea) Culicimorpha) Nematocera) Diptera) Endopterygota, ((( ( Pediculus humanus) Pediculus) Pediculidae) Anoplura) Phthiraptera) Paraneoptera) Neoptera) Pterygota) Dicondylia) Insecta) Hexapoda) Pancrustacea) Mandibulata, ((((((( Ixodes scapularis) Ixodes) Ixodidae) Ixodoidea) Ixodida) Parasitiformes) Acari) Arachnida) Chelicerata) Arthropoda) Panarthropoda) Protostomia) Coelomata) Bilateria) Eumetazoa) Metazoa, ((((((( Schizosaccharomyces pombe) Schizosaccharomyces) Schizosaccharomycetaceae) Schizosaccharomycetales) Schizosaccharomycetes) Taphrinomycotina, ((( Saccharomyces cerevisiae) Saccharomyces) Saccharomycetaceae) Saccharomycetales) Saccharomycetes) Saccharomycotina, ((( Neurospora crassa) Neurospora) Sordariaceae) Sordariales) Sordariomycetidae) Sordariomycetes) Sordariomyceta, ((( Aspergillus terreus, Aspergillus niger, Aspergillus clavatus, Aspergillus oryzae, Aspergillus flavus) Aspergillus) mitosporic Trichocomaceae, ( Emericella nidulans) Emericella, ( Neosartorya fischeri) Neosartorya fischeri group, ( Aspergillus fumigatus) Neosartorya fumigata) Neosartorya) Trichocomaceae) Eurotiales) Eurotiomycetidae) Eurotiomycetes) Leotiomycota) Pezizomycotina) Saccharomycota) Ascomycota) Dikarya) Fungi) Fungi/Metazoa group) Eukaryota) cellular organisms);
```



## References and Notes

1. Hartl, D. L. & Clark, A. G. *Principles of population genetics*, chap. Molecular population genetics, 317–386 (Sinauer Associates, Inc. Publishers, 2006), 4th edn.
2. Mindell, D., Sites, J. & Graur, D. Mode of allozyme evolution: Increased genetic distance associated with speciation events. *J. evol. Biol* **3**, 125–131 (1990).
3. Barraclough, T. G. & Savolainen, V. Evolutionary rates and species diversity in flowering plants. *Evolution* **55**, 677–683 (2001).
4. Lanfear, R., Ho, S. Y. W., Love, D. & Bromham, L. Mutation rate is linked to diversification in birds. *Proc Natl Acad Sci U S A* **107**, 20423–20428 (2010).
5. Lanfear, R., Bromham, L. & Ho, S. Y. W. Reply to englund: Molecular evolution and diversification—counting species is better than counting nodes when the phylogeny is unknown. *PNAS* **108**, E85–E86 (2011).
6. Eo, S. H. & DeWoody, J. A. Evolutionary rates of mitochondrial genomes correspond to diversification rates and to contemporary species richness in birds and reptiles. *Proc Biol Sci* **277**, 3587–3592 (2010).
7. Webster, A. J., Payne, R. J. H. & Pagel, M. Molecular phylogenies link rates of evolution and speciation. *Science* **301**, 478 (2003).
8. Webster, A. J., Payne, R. J. H. & Pagel, M. Response to comments on “molecular phylogenies link rates of evolution and speciation”. *Science* **303**, 173c (2004).
9. Venditti, C., Meade, A. & Pagel, M. Detecting the node-density artifact in phylogeny reconstruction. *Syst Biol* **55**, 637–643 (2006).
10. Venditti, C. & Pagel, M. Model misspecification not the node-density artifact. *Evolution* **62**, 2125–2126 (2008).
11. Venditti, C. & Pagel, M. Speciation as an active force in promoting genetic evolution. *Trends Ecol Evol* **25**, 14–20 (2010).
12. Pagel, M., Venditti, C. & Meade, A. Large punctuational contribution of speciation to evolutionary divergence at the molecular level. *Science* **314**, 119–121 (2006).
13. Smith, J. M. & Haigh, J. The hitch-hiking effect of a favourable gene. *Genet Res* **23**, 23–35 (1974).
14. Barton, N. H. Genetic hitchhiking. *Philos Trans R Soc Lond B Biol Sci* **355**, 1553–1562 (2000).
15. Smith, J. M. & Haigh, J. The hitch-hiking effect of a favourable gene. *Genet Res* **89**, 391–403 (2007).
16. Templeton, A. R. The reality and importance of founder speciation in evolution. *Bioessays* **30**, 470–479 (2008).
17. Henikoff, S. & Henikoff, J. G. Amino acid substitution matrices from protein blocks. *Proc Natl Acad Sci U S A* **89**, 10915–10919 (1992).
18. Arbiza, L., Patricio, M., Dopazo, H. & Posada, D. Genome-wide heterogeneity of nucleotide substitution model fit. *Genome Biol Evol* **3**, 896–908 (2011).
19. Abascal, F., Zardoya, R. & Posada, D. Protest: selection of best-fit models of protein evolution. *Bioinformatics* **21**, 2104–2105 (2005).
20. Zuckerkandl, E. & Pauling, L. B. *Molecular disease, evolution, and genetic heterogeneity*, 189–225 (Academic Press, New York, 1962).
21. Zuckerkandl, E. & Pauling, L. Molecules as documents of evolutionary history. *J Theor Biol* **8**, 357–366 (1965).

22. Marigoliash, E. Primary structure and evolution of cytochrome c. *Proc Natl Acad Sci U S A* **50**, 672–679 (1963).
23. Kimura, M. Evolutionary rate at the molecular level. *Nature* **217**, 624–626 (1968).
24. King, J. L. & Jukes, T. H. Non-darwinian evolution. *Science* **164**, 788–798 (1969).
25. Kimura, M. Model of effectively neutral mutations in which selective constraint is incorporated. *Proc Natl Acad Sci U S A* **76**, 3440–3444 (1979).
26. Ohta, T. Slightly deleterious mutant substitutions in evolution. *Nature* **246**, 96–98 (1973).
27. Kimura, M. & Ota, T. On some principles governing molecular evolution. *Proc Natl Acad Sci U S A* **71**, 2848–2852 (1974).
28. Kimura, M. Possibility of extensive neutral evolution under stabilizing selection with special reference to nonrandom usage of synonymous codons. *Proc Natl Acad Sci U S A* **78**, 5773–5777 (1981).
29. Ohta & Gillespie. Development of neutral and nearly neutral theories. *Theor Popul Biol* **49**, 128–142 (1996).
30. Bromham, L. Molecular clocks and explosive radiations. *J Mol Evol* **57 Suppl 1**, S13–S20 (2003).
31. Gillespie, J. H. The molecular clock may be an episodic clock. *Proc Natl Acad Sci U S A* **81**, 8009–8013 (1984).
32. Gillespie, J. H. Natural selection and the molecular clock. *Mol Biol Evol* **3**, 138–155 (1986).
33. Murphy, R. W. & Lovejoy, N. R. Punctuated equilibrium or gradualism in the lizard genus *sceloporus*? lost in plesiograms and a forest of trees. *Cladistics* **14**, 95–103 (1998).
34. Fitch, W. M. & Bruschi, M. The evolution of prokaryotic ferredoxins—with a general method correcting for unobserved substitutions in less branched lineages. *Mol Biol Evol* **4**, 381–394 (1987).
35. Fitch, W. M. & Beintema, J. J. Correcting parsimonious trees for unseen nucleotide substitutions: the effect of dense branching as exemplified by ribonuclease. *Mol Biol Evol* **7**, 438–443 (1990).
36. Smith, S. A. & Donoghue, M. J. Rates of molecular evolution are linked to life history in flowering plants. *Science* **322**, 86–89 (2008).
37. Lanfear, R., Welch, J. J. & Bromham, L. Watching the clock: studying variation in rates of molecular evolution between species. *Trends Ecol Evol* **25**, 495–503 (2010).
38. Zeldovich, K. B., Berezovsky, I. N. & Shakhnovich, E. I. Protein and dna sequence determinants of thermophilic adaptation. *PLoS Comput Biol* **3**, e5 (2007).
39. Jordan, I. K. *et al.* A universal trend of amino acid gain and loss in protein evolution. *Nature* **433**, 633–638 (2005).
40. Tatusov, R. L., Koonin, E. V. & Lipman, D. J. A genomic perspective on protein families. *Science* **278**, 631–637 (1997).
41. Pagel, M. Inferring the historical patterns of biological evolution. *Nature* **401**, 877–884 (1999).
42. Freckleton, R. P., Harvey, P. H. & Pagel, M. Phylogenetic analysis and comparative data: a test and review of evidence. *Am Nat* **160**, 712–726 (2002).
43. Pagel, M. Inferring evolutionary processes from phylogenies. *Zoologica Scripta* **26**, 331–348 (1997).
44. Kersey, P. J. *et al.* Ensembl genomes: extending ensembl across the taxonomic space. *Nucleic Acids Res* **38**, D563–D569 (2010).
